# Supplementary material for: What do we know about open spaces and their ecosystem services in the European Alps? Results of a scoping literature review
Source: Copernicus journal article supplement (doi:10.5194/gh-80-207-2025), 2025-08-12
Supplement: Supplementary file 1 [file gh-80-207-2025-supplement.zip]

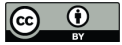

*Supplement of*

**What do we know about open spaces and their ecosystem services  
in the European Alps? Results of a scoping literature review**

**Kerstin Ströbel et al.**

*Correspondence to:* Kerstin Ströbel ([kerstin.stroebe1@uni-wuerzburg.de](mailto:kerstin.stroebe1@uni-wuerzburg.de))

- [gh-80-207-2025-supplement-title-page.pdf](#)
- Electronic Supplementary Material (ESM)
  - [Supplement S1.xlsx](#)
  - [Supplement S2.xlsx](#)

The copyright of individual parts of the supplement might differ from the article licence.
