# Supplementary material for: What do we know about open spaces and their ecosystem services in the European Alps? Results of a scoping literature review
Source: Copernicus journal article supplement (doi:10.5194/gh-80-207-2025), 2025-08-12
Supplement: Supplementary file 1 [file gh-80-207-2025-supplement.zip]

## Sheet: S1.1
Table S1.1: Flow Chart Sampling Process
		Process Search International Publications				Process Search Publications of relevant alpine institutions
Searching	Search String	Web of Science (CC)	Scopus	GEOBASE/GeoRef		Institution	No.
	English
	“open space*’ and “spatial planning”	61	182	71		CIPRA	1
	“open space*” and alp*	136	179	65		Alpine Convention	17
	“open space*” and rural	300	628	250		EUSALP	1
	alp* and spatial planning	753	918	569		Arge Alp	3
	alp* and “spatial planning”	72	150	80		AlpArc	2
	German
	Freiraum und Raumplanung	0	0	0		AlpPlan	1
	Freiraum und Raumordnung	0	0	0		CIPRA	1
	Freiraum und alp*	0	0	0		Alpine Convention	10
	Freiraum und rural	0	0	0		EUSALP	0
	alp* und Raumplanung	0	9	10		Arge Alp	3
	alp* und Raumordnung	0	3	4		AlpArc	2
	Sum	1322	2069	1049			41
		4440
Screening		Records after duplicates removed
	Sum	2521			Duplicates: 1919
		Records after title and abstract screening
	Sum	161			Excluded titles: 2360	34	Excluded titles: 10
		Publications retrieved at full text (n=180)
	Sum	130			Unretrieveable full texts (Not accessible, n=31)	34	Unretrieveable full texts (Not accessible, n=0)
		Publications after full text screening
	Sum	60			Excluded full texts, with reasons (n=70), Excluded on: not meeting eligibility criteria, spatial extent of study area was off, paywall, wrong language upon full text review, too broad or too narrow for topic analysis (eligibility criteria)	21	Excluded full texts, with reasons (n=13), Excluded on: does not meet eligibility criteria: focus only on biodiversity, project reports, workshops, conference papers
		Publications from revising and retrieving references
	Sum	17
Synthesis		Publications included in the narrative synthesis
	Sum	60			17	21
	Total Sum	98

## Sheet: S1.2
Table S1.2: Interregional Institutions
Institution	Spatial extent	Countries included (NUTS1)	Work and objectives	Website(s) searched
AlpPlan	European Alps	DE, IT, AT, CH, SI, FR, ESP, GB, PT, CA (ongoing expansion of Network)	AlpPlan (alpine spatial planning network) is a European Working Group (EWG) in the Alpine region. The overall objective of AlpPlan is to promote cooperation and coordination in the field of spatial planning in the Alpine region, especially from a cross-border perspective. Through mutual exchange and cooperation, the network is committed to contributing to sustainable territorial development from …	https://www.arl-international.com/activities/alpplan-network
CIPRA	Alpine Convention and "pre-Alps"	DE, AT, FR, IT, LIE, SI, South Tyrol,CH	Since its founding in 1952 CIPRA has been bringing people and organisations together across cultural, geographic, political and language divides, people who are committed to sustainable development in the Alps; it has done so as an umbrella organization since 1975. Its members include more than 100 associations, organisations and individuals. CIPRA strives to lend more weight to Alpine policy on …	https://www.cipra.org/en/current/publications
Alpine Convention	Alpine Convention	DE, IT, AT, CH, SI, FR, LIE, MC	The Alpine Convention entails the guiding principles towards a sustainable life in the Alps, now and in the future. The Convention is the legal basis for safeguarding the sensitive Alpine ecosystems, the regional cultural identities, heritage and traditions in the Alps. At the same time, it is a living instrument, which allows the signatories to deal jointly with pressing and cross-cutting issues…	https://www.alpconv.org/en/home/topics/
EUSALP	EUSALP	DE, IT, AT, SI, FR, CH, LIE	'Macroregional strategy' is an integrated framework endorsed by the European Council, which may be supported by the European Structural and Investment Funds among others, to address common challenges faced by a defined geographical area relating to Member States and third countries located in the same geographical area. This strengthened cooperation shall contribute to the achievement of economic…	https://alpine-region.eu/topics-action-groups
Arge Alp	Bavaria, Bolzano- Alto Adige, Graubünden, region of Lombardy, federal states of Vorarlberg, Tyrol and Salzburg, Trentino, St. Gallen, Ticino	AT, DE, IT, CH	ARGE ALP has set itself the goal of addressing common concerns in the cultural, social, economic and ecological fields through cross-border cooperation and the smallest possible institutionalization. Furthermore, the awareness of the common responsibility for the Alpine habitat is to be deepened, contacts between the peoples promoted and the positions of the regions strengthened in order to be ab…	https://www.argealp.org/de/arge-alp/publikationen
AlpArc	EUSALP	Managers of protected ares in the Alps	The association’s main goal is to promote the exchange of expertise, techniques and methods among the managers of all the large protected areas in the Alps such as national parks, regional nature parks, nature reserves, biosphere reserves, tranquility zones, UNESCO World Heritage Sites, geological reserves and sites granted a special protection status. This exchange allows for parks to take part …	https://alparc.org/news; https://alparc.org/alpine-resources

## Sheet: S1.3
Table S1.3: Sample Results
No.	Authors	Title	Abstract	Type of Publication	Journal	Literature data bank (Scopus / WoS/both)	DOI/ISBN	Year of publication	Institution (1st Author)	Country of origin	Region of origin (1st Author)	Gender	Language of paper	Case Study region	Method & Style of publication (in detail)	Method applied	type of document	Empirical / theoretical	Topic (own notes)	Challenges and problems (own notes in addition to "Topic (own notes)")	Code 1	Code 2	Code 3	Code 4
1	Bätzing, Werner	Die Alpen im Spannungsfeld der europaischen Raumordnungspolitik Anmerkungen zum EUREK-Entwurf auf dem Hintergrund des aktuellen Strukturwandels im Alpenraum (The Alps: in the Web of European Spatial Planning Policy Comments on the ESDP draft against the backdrop of on-going structural changes in the Alp Region)	The first part of this article consists of a local-authority level analysis ofthe structural changes currently in process in the Alps Region, which are then categorised at regional level. In simple terms this process can be described as one of "urbanisation and depopulation"; however, the wide disparities which are evident do call for regionally specific strategies. Since transnational co-operati…	Journal article	Raumforschung und Raumordnung	Scopus	10.1007/BF03183772	1999	University of Erlangen	Germany	Bavaria	Male	German	EU	Comment	literature analysis	Discursive	Theoretical	Bevölkerungsentwicklungen in den alpinen Regionen und damit resultierende Herausforderungen. Vorstellung und Charakterisierung des Europäischen Raumentwicklungskonzepts", außerdem Zweck der Alpenkonventions-Protokolle. Außerdem werden von Bätzen die drei Raum-Ebenen im EUREK beschrieben (europäisch/transnational/regional und lokal), Grundidee der EUREK: Europäische Großregionen mit je spezifische…	Typical “problems” of European development with increasing traffic and agriculture in “unfavourable locations”; a European solution is needed, as these problems cannot be borne alone; globally vs. nationally organized state systems, fear of increasing spatial disparities that endanger the “cohesion” of the EU, Alps as a counter-region to European economic centers in danger of economic backwardnes…	Code 1.1	Code 3.2	Code 4.2
2	Bätzing, Werner	Die Alpen - tiefgreifende Nutzungsveränderungen als Herausforderungen für den Naturschutz. (The Alps - profound changes in human uses present challenges to nature conservation)	In order to understand the challenges currently facing nature conservation in the Alps, this introductory paper analyses the demographic and economic changes in the region since the onset of modernity (1880): During phase 1 (1880-1950) the Alps were a disadvantaged region in Europe, during phase 2 (1950-1980) they caught up with the average level of development in Europe, and in phase 3 (since 19…	Journal article	Natur und Landschaft	Scopus	10.17433/9.2017.50153497.398-406	2017	University of Erlangen	Germany	Bavaria	Male	German	EUSALP	Comment	literature analysis	Discursive	Theoretical	Naturschutz in den Alpen: Einfluss des sozioökonomischen Waldels auf die sehr große Artenvielfalt der Alpen, vielzählige Staatsgrenzen zerschneiden das Gebirge, weswegen nationale Strategien nicht ausreichen, Klimawandel in den Alpen tendenziell stärker ausgeprägt, als in vielen anderen Räumen Europas, alpine strukturelle Entwicklung: Industriell, modern, usw. Auch Veränderung seit 1880 in den Al…	Settlement development, land use and pressure on the natural diversity of the Alps, heavily isolated open spaces. Heavy pollution, also from traffic, changes in use affect biodiversity, decline of alpine pastures and plateaus, large reservoirs on plateaus since 1955 also change the water balance of the Alpine regions, also reservoirs for artificial snowmaking, large ski resorts on glaciers, Glaci…	Code 1.1	Code 3.2	Code 4.1
3	Bertram, Dominik; Chilla, Tobias; Lambracht, Markus	The Alpine settlement system: capturing relevance beyond size	The Alpine settlement system is of key relevance for sustainable development in the mountain region. However, maps on the European scale indicate almost no cities in the Alps but only a few small towns. We argue that a differentiated mapping approach should involve medium and small settlements in mountain regions, as they have a high functional importance for the surrounding area. We present an a…	Journal article	Journal of Maps	both	10.1080/17445647.2022.2164229	2023	University of Erlangen	Germany	Bavaria	Male	English	EUSALP	Mapping approach	quantitative	Secondary data analysis	Empirical	Mapping-approach on towns in the Alps, 9th Report on the State of the Alps addresses also this topic. Alps are portrayed as "empty space" with no towns, häufig ein Bias der Siedlungsszenerie in den Alpen. Trying to prevent the metropolitain bias that exists through the main connectivity routes between the main areas: Munich, Innsbuck, Bolzano, Trento, Verona, developement stressors are mainly con…	settlement pressures are everywhere, alpine region is far from being "empty space", particular awareness needs to be put on main axes, but also on inner-alpine smaller axes that do not appear in national planning systems	Code 3.1	Code 1.1
4	Bertrand, Nathalie; Cremer-Schulte, Dominik, Perrin, Mathieu	Strategic Spatial Planning and Territorial Asymmetries. Grenoble and Greater Geneva: Two Alpine City Regions Put to the Challenge of Coherence.	No abstract available	Journal article	Journal of Alpine research/Revue de Geographie Alpine	both	10.4000/rga.3126	2015	Irstea Grenoble, UR Development of Mountain Regions	France	Grenoble	Female	English	Greater Genova and Grenoble	Stakeholder-Interviews	qualitative	Case study	Empirical	Case study analysis in Grenoble city and the cross-border metropolitan area of Greater Geneva, analysis of planning documents on those areas: questions of territorial coherence, planning developments go hand in hand with transforming and restructuration processes, calls exists for stronger regional, spatial or even urban governance, planning developments depent on collective networks and stakehol…	Power of legislation and planning documents to prevent land take (i.e. with arable land), huge challenge in France to protect arable land. Diverse levels of protection offered by SCoTs to protect arable land, Local communities are unequally equipped to deal with the governance on which the drafting of important documents is based. Huge questions of local geopolitical stakes and social representat…	Code 3.2	Code 4.1	Code 4.2
5	Bovet, Jana; Reese, Moritz; Köck, Wolfgang	Taming expansive land use dynamics - Sustainable land use regulation and urban sprawl in a comparative perspective	Urban sprawl and infrastructure pose a major sustainability challenge. It is therefore extremely impor-tant for countries to implement advanced land use planning and steering instruments that are designedto mitigate urban sprawl and to enforce thrift development within a coherent legal framework of sustain-able land use governance. The following article presents the results of a comparative legal…	Journal article	Land Use Policy	both	10.1016/j.landusepol.2017.03.024	2018	Department of Environmental and Planning Law, Helmholtz Centre for Environmental Research GmbH	Germany	Saxony (Leipzig)	Female	English	Germany and Switzerland	comparative assessment (survey) among selected countries explores how land use planning and approval regimes take account of the basic requirements of sustainable land use regulation, which are also basic precondition to curbing green space consumption effectively and efficiently.	literature analysis	Discursive	Empirical	Open spaces and healthy soils are fundamental to sustaining the natural environment and ensuring the production of healthy food. High pressures through settlements and infrastructures, green land is often consumed in excessive and inefficient ways. Major threat to sustainability (global perspective). Urban sprawl also generates increasing costs, importance for countries to implement advanced land…	ecologically qualitative objectives are needed, based on the concept of planetary boundaries, natural resources are the basis for any development. It is necessary to define quantitative limits to the consumption of open space, "integration" of social, ecological and economic interests and brought into durable balance, inlcusion of interests of different sectors on resources, integrative planning …	Code 2.2	Code 1.1	Code 3.2
6	Cammerer, Holger; Thieken, Annegret H., Verburg, Peter H.	Spatio-temporal dynamics in the flood exposure due to land use changes in the Alpine Lech Valley in Tyrol (Austria)	Flood risk is expected to increase in many regions of the world in the next decades with rising flood losses as a consequence. First and foremost, it can be attributed to the expansion of settlement and industrial areas into flood plains and the resulting accumulation of assets. For a future-oriented and a more robust flood risk management, it is therefore of importance not only to estimate poten…	Journal article	Natural Hazards	both	10.1007/s11069-012-0280-8	2013	Institute of Geography, University of Innsbruck	Austria	Tyrol (Innsbruck)	Male	English	Alpine Lech Valley Austria	Case Study	quantitative	Secondary data analysis	Empirical	Flooding events and related economicdamage due to natural hazards, alpine floods in August 2005 hin Alps severely, monetory losses of 2.6 billion euros in Austria, Germany and Switzerland in total. Flood damage is expected to increase further in the future. definition of flood, they do not automatically lead to a harmful outcome since damaging floods result from an interaction of physical and soc…	soil enables floodi prevention, but if they are already saturated, it is hard to prevent flood damage, Vulnerability to floodings, valley areas, also built-up areas, logistic regression model. It is necessar to bundle building plan areas to building development zones	Code 2.2	Code 4.2	Code 2.1
7	Cavin, Joelle Salomon	Between distance and proximity: nature parks and the city in Switzerland	No abstract available	Journal article	Journal of Urban Research	Scopus	10.4000/articulo.3283	2017	University de Lausanne, Insitut de géographie et durabilité	Switzerland	Lausanne	Female	English	Switzerland	Case Study in whole of Switzerland. 3 data collection sources, discussions within a think tank by the Swiss Feder Office for the Environment in order to set up the definition of a new category of Urban nature Parks in Switzerland. Second soure of data from analysis of published documents dealing with nature parks in Switzerland, i.e. texts about the history of the parks, legal texts and explanato…	mixed-methods	Case Study	Empirical	The umbrella organization for parks in Switzerland are campaigning for accessibility, protected areas in Switzerland deal with two elements: proximity (natural areas are never further away than 10 kilometres from a town or city). Also separation: urban "Curtain-wall" is opened to see the natural value. Nature is both very close and external. Different concepts from urban nature to protected natur…	it is difficult to establish protected areas in switzerland, functionality of parks. Questions of fundings of these parks is diverse, integrating this into legal policies is the main challenge, as constraints exist. Aim of Agglomeration paks is to secure large open spaces around aras that are already protected (conservation of open highly urbanized non built aras at the outskirts of cities). Corr…	Code 3.2	Code 3.1
8	Drobnik, T; Huber, R; Grêt-Regamey, A	Coupling a settlement growth model with an agro-economic land allocation model for securing ecosystem services provision	Mountain landscapes are undergoing rapid land-use changes. Settlement expansion, the intensification of agricultural land-use practices, and farmland abandonment result in a decline of natural and semi-natural habitats and the related ecosystem services (ES). In this context, spatial planning has emerged as a key instrument for the management of ES provision. To better understand trade-offs and i…	Journal article	Journal of Environmental Planning and Management	both	10.1080/09640568.2016.1197828	2017	Swiss federal institute of Technology (ETH)	Switzerland	Zurich	Male	English	Valais Switzerland	Raster-based modeling ramework, coupling and agent-based, agro-economic optimization model and a cellular-automata-based settlement growth model (ALUAM allocation model and DAS dynamic settlement allocaction model)) also based on workshops and stakeholder meetings, values and weights for ES can be defined, Case study in Canton of Valais in Switzerland	mixed-methods	Case study	Empirical	anthropogenic and natual land-use changes in mountain landscapes. These mountain landscapes are providers for important ecosystem services, such as food production, drinking water, habitats for animals and plants, as well as cultural services to people living in and outside these areas. Climate and socio-economic changes however, increasingly threaten a sustainable provision of these services. ma…	land use pressures high on valley floors (urbanization and intensification of land-use agriculture), also loss of culture of tradition that formed landscape (agriculture and biodiversity migration), loss of ES provision in marginal areas, also rising temperatures prolong vegetation period, supporting shrub and forest enchroachment which also leads to landscape change, role of spatial planning is …	Code 1.1	Code 2.2
9	Dubo, T; Palomo, I; Camacho, LL; Locatelli, B; Cugniet, A; Racinais, N; Lavorel, S	Nature-based solutions for climate change adaptation are not located where they are most needed across the Alps	Climate change impacts social-ecological systems in mountainous areas by increasing certain natural disasters and changing nature’s contributions to people (NCP). Nature-based solutions (NbS) are increasingly implemented to help local communities adapt to climatic hazards. However, the relevance of their location in relation to those hazards and local NCP has hardly been addressed. In the PORTAL …	Journal article	Regional Environmental Change	both	10.1007/s10113-022-01998-w	2023	University Grenoble Alpes	France	Grenoble	Male	English	Alpine Convention	Grey literature review on nature-based solutions and mapping of climate variables, computation of demand-supply ration and flow-supply ration for each NCP, Data analysis	literature analysis	Discursive	Empirical	climate change effects on humanity and nature based-solutions, analysis of nature's contribution to people, multifunctionality of nature-based solutions in the Alps is given, adaptation is possible towards natural hazards (multiple hazards in one NbS, NbS target drought and also different NCP including food production, freshwater supply and soil quality (material, regulation, non-material such as…	NbS for soil protection and water scarcity, interconnection of different NbS, all implemented by land use management: e.g. drought and floods are addressed jointly by wetland restoration	Code 2.2	Code 2.1
10	Vigl, LE; Depellegrin, D; Pereira, P; de Groot, R; Tappeiner, U	Mapping the ecosystem service delivery chain: Capacity, flow, and demand pertaining to aesthetic experiences in mountain landscapes	Accounting for the spatial connectivity between the provision of ecosystem services (ES) and their beneficiaries (supply–benefit chain) is fundamental to understanding ecosystem functioning and its management. However, the interrelationships of the specific chain linkswithin ecosystems and the actual benefits that flow from natural landscapes to surrounding land have rarely been analyzed. We pres…	Journal article	Science of the Total Environment	both	10.1016/jscitotenv.2016.08.209	2017	Eurac Research	Italy	Bolzano	male	English	Puez-Geisler national Park (Northern Italy)	Case Study in Puez-Geisler Nature Park in Northern Italy, expert-based jedgment of local land use data, flow process calculation, ES delivery chain modelling	mixed-methods	Case study	Empirical	Artificial Intelligence for Ecosystem Services, research for the ES delivery chain concept and to overcome the spatial discrepancy between SPAs and SVAs (Service providing and service benefitting areas), ES delivery chain modelling: capacity modeling regarding land aesthetic values, including very high capacity for water bodies, water courses, wetlands and rock, high capacity	ES capacity assessment is a flexible tool for the analysis of landscape aesthetics in mountainous regions and to define the value of different land uses regarding different ES services	Code 2.3	Code 4.2
11	Eichhorn S.; Diller C.; Pehlke D.	The Development of the Regulatory Intensity of German Regional Plans from 1985 to 2017. An Empirical Contribution to the Discussion on the Loss of Importance of Spatial Planning; [Die Entwicklung der Regulierungsintensität der deutschen Regionalpläne von 1985 bis 2017. Ein empirischer Beitrag zur Diskussion um den Bedeutungsverlust der Raumordnung]	Als ein Beitrag in der Debatte um Deregulierung der Raumordnung und schlanke Regionalpläne wird mit dem vorliegenden Beitrag die erste Langzeituntersuchung für Deutschland vorgelegt, in dem die Regulierungsintensität aller im Jahr 2017 rechtsgültigen Regionalpläne zu den Themen Siedlungs- und Freiraumentwicklung im Zeitverlauf untersucht wurde. Im Ergebnis kann die Vermutung einer generellen Dere…	Journal article	Raumforschung und Raumordnung	Scopus	10.14512/rur.941	2023	Insitut für Landes- und Stadtentwicklungsforschung	Germany	Dortmund	male	German	Germany	Comment	literature analysis	Discursive	Theoretical	Deregulation and "slim" regional planning, regulationintensity of spatial planning, requests for new forms of "Governance" in the 1980s, sceptical view for planning processes in the 1970s, national spatial planning lacks in gaining support from federal states, planning competences were shifted from national to local level, also happended in Italy, urban and metropolitan areas gained access to mor…	intensity of regulation, management and governance in regards to spatial planning, critical view on role and importance of spatial planning in sectoral plans, rather documentary work than actual implementation, stronger implementation of informal instrumentes	Code 4.2	Code 3.2
12	Fabbro, S; Haselsberger, B	Spatial Planning Harmonisation as a Condition for Trans-National Cooperation	This paper explores a possible direction for enabling trans-national cooperation in Europe through forms of spatial planning harmonisation. The specific case considered is that of the trans-national border area located in the wider Alpine-Adriatic context, comprising Carinthia (Austria), Friuli Venezia Giulia (Italy) and Slovenia. Starting from a general analysis of spatial planning systems and i…	Journal article	European Planning Studies	both	10.1080/09654310903053521	2009	University of Udine	Italy	Udine	Male	English	Alpine-Adriatic Area	Case Study in Alpine-Adriatic Area	literature analysis	Discursive	Theoretical	Functions of spatial planning systems: follows four main functions, strategic, regulative, design, informative, problems lay mostly in coordination problems between different types of plans and levels of planning as well as functions, shared territorial knowledge needed to adress alpine spatial planning harmonization	Importance of spatial planning harmonisation, governance	Code 4.1	Code 4.2
13	Fabbro, S	The Euroregional Planning Approach as a Possible Variant of Regional Planning in Complex Multi-Regional Spaces Introduction to this Special Issue of disP	This special issue of disP is dedicated to the exploration of some of the difficulties as well as the novelties connected with the construction of Euroregions, a major political and spatial challenge for the future of the whole of Europe. The special issue presents a series of contributions previously presented and discussed at a meeting held at the University of Udine in northeastern Italy in 20…	Special Issue of disP	disP- The Planning Review	both	10.1080/02513625.2010.10557109	2010	University of Udine	Italy	Udine	Male	English	EU	Review and commentary on the idea of regional planning in Europe	literature analysis	Discursive	Theoretical	Questions of what is a region, regional planning, planning in the Euregion rather than the region, dealing with Euregion planning approach, history of regional planning, goal is to compose environmentally balanced regions, Europe deals as a "regions" with different management systems, coordination between sector-specific plans and projects in the struggle, different planning styles Nordic vs. Fre…	governance, and planning on euregional level rather than regional level? Coordination between sector-specific plans is difficult especially cross-border, new forms of regional plans neeeded? Process of insitutional development	Code 4.1	Code 3.2	Code 4.2
14	Farinós-Dasí, J; Pinazo-Dallenbach, P; Sánchez-Manjavacas, EP; Rodríguez-Bernal, DC	Disaster risk management, climate change adaptation and the role of spatial and urban planning: evidence from European case studies	This paper advances knowledge and understanding of the relationships between risk management, climate change adaptation and spatial planning as good territorial governance practices. The aim is to present evidence on how risks and their management are progressively being integrated into national planning systems in order to reduce territorial vulnerability and costs related to natural events in t…	Journal article	Natural Hazards	both	10.1007/s11069-024-06448-w	2024	University of Valencia	Spain	Valencia	Male	English	Alpine Convention	Case study in Alpine region, literature review on how to conceive and apply spatial planning in terms of risk management related to climate change through hypothesis testing , SWOT analysis in case studies, also discussion following CAME analysis, evolution to DRM, recognizing climate change threats, sectoral approaches , heterarchical planning,	mixed-methods	Case study	Empirical	risk management, climate change adaptation and spatial planning nexus as a good territorial govenrance practic to reduce consequences by natural hazards, how can planning systems be involved, spatial planning is based on strategical approaches and includes a regulative dimension, contributes to the conception and application of public policies aimed at the well-being of society in each territory,…	lack of spatial planning as integrated tool in social and ecological sytems, ex ante operationability of planning in both systems, costs by natural disasters on economy increase steadily, spatial planning is an appropriate tool for the effective management of limited economic resources, links decisions-making routines and fosters participation, space for coherence of sectoral policies through a c…	Code 4.1	Code 4.2	Code 2.3	Code 3.1
15	Gonzalez-Redin, J; Luque, S; Poggio, L; Smith, R; Gimona, A	Spatial Bayesian belief networks as a planning decision tool for mapping ecosystem services trade-offs on forested landscapes	An integratedmethodology,basedonlinkingBayesianbeliefnetworks(BBN)withGIS,isproposedfor combining availableevidencetohelpforestmanagersevaluateimplicationsandtrade-offsbetween forest productionandconservationmeasurestopreservebiodiversityinforestedhabitats.ABayesian belief networkisaprobabilisticgraphicalmodelthatrepresentsvariablesandtheirdependencies through specifyingprobabilisticrelationships…	Journal article	Environmental Research	both	10.1016/j.envres.2015.11.009	2016	James Hutton Insitute Craigibuckler	Scotland	Aberdeen	Male	English	Vercors Regional Park (France)	Case study and GIS-based decision tool in french alps	quantitative	Secondary data analysis	Empirical	Focus on Forest ecosystem services: flood regulation, soil erosion control services provided by forests have a direct impact on local population, whereas carbon sequestration has a global influence. Ecosystem service concept into the framework of forest mangement loeads to more holistic perception of the role of forests, GIS is an appropriate tool to visualize spatial problems., bayesian beliefe …	Integrating Ecosystem Service concept into spatial tools, different goals for land use development exist always, with climate change societal demand fro goods and services from forest are also changing, share increase of renewables results in a greater demand for example from forest biomass for bio-energy generation, stress for open and unused land,	Code 2.2	Code 2.3	Code 1.1
16	Gottero, E; Cassatella, C; Larcher, F	Planning Peri-Urban Open Spaces: Methods and Tools for Interpretation and Classification	Today, planning an urban–rural interface requires redefining the planner’s role and toolbox. Global challenges such as food security, climate change and population growth have become urgent issues to be addressed, especially for the implications in land use management. Urban–rural linkages, socio-economic interactions and ecological connectivity are the main issues on which the new urban agenda a…	Journal article	land	both	10.3390/land10080802	2021	University of Turin	Italy	Turin	Male	English	Turin (Italy)	Case study of planning peri-urban area of Turin (Italy); definition of the knowledge framework and the classification of peri-urban landscape units.	quantitative	Secondary data analysis	Empirical	peri-urban aras are relevant for balancing complex system of relationshiops between cities and countrysides,peri-urbanization, as the expansion of cities due to settlement and infrastrucutral devlopment resulted in taking of agricultural and and amplification of social and economic rift between urban and rural areas. Zone of contact between city and countryside, high degree of fragmentation and l…	technical gaps in frameworks exist to adress global demands and EU targets, e.g. increase of green spaces, decrease of land consumption, increase organic farming and biodiversity-rich landscape features, reducing the use of pesticides, increasing protected areas, planting treen and restoring rivers. Planners will have the obligation to reflect on possible integrated and multiscale policy and plan…	Code 3.1	Code 3.2	Code 4.2	Code 3.1
17	Gottero, E; Larcher, F; Cassatella, C	Defining and Regulating Peri-Urban Areas through a Landscape Planning Approach: The Case Study of Turin Metropolitan Area (Italy)	Peri-urbanization is a global phenomenon strongly linked to socio-demographic and settlement dynamics. Although peri-urbanization is a topic widely debated in academic literature, especially in the field of urban and regional planning, there is no universal definition, and different types and interpretations of peri-urban areas can be found in the literature. Identifying physical limits and bound…	Journal article	land	both	10.3390/land12010217	2023	Politecnico di Torino	Italy	Turin	Male	English	Turin (Italy)	Case study of the General Territorial Plan of Turin	mixed-methods	Case study	Empirical	peri-urban landscapes as part of the discussion for landscape and spatial planning, as a "third" space: neither urban, rural, city, nor countryside, Analysis of plans and policy documents related to the Turin peri-urban area from 2001 to 2021.	same as above, but role of General Territorial Plan of the Turin Metropolitan Area (TMA); objectives to be included into plans: limiting soil consumption, as well as defining urban edges and open spaces as part of upgrading of interstitial and peri-urban agricultural areas, also "Green Crown" (Corona Verde) project to enhance the landscape quality of open spaces: qualifying urban edges and gates,…	Code 3.1	Code 4.1	Code 1.2
18	Gret-Regamey A.; Walz A.; Bebi P.	Valuing ecosystem services for sustainable landscape planning in Alpine regions	Alpine regions provide diverse ecosystem goods and services (ES) to human society. Yet as many of these ES are not bought or sold, their value must be estimated using a surrogate for observable behavior witnessed in the marketplace. The present article reviews ES valuation studies conducted in the European Alps. In addition, we present the results of a case study where we integrated the value of …	Journal article	Mountain Research and Development	Scopus	10.1659/mrd.0951	2008	Swiss Federal Institute of Technolgoy in Zurich (ETH)	Switzerland	Zurich	Female	English	Davos (Swiss Alps)	Review of ES valuation studies conducted in the European Alps, also result presentation of a case study in Davos Swiss Alps	quantitative	Secondary data analysis	Theoretical	landscape planing and the impact of alternative plans, value of ecosystem goods and services is often not included into the planning process, Alps in particular provide major ES, protection against natural hazards, carbon sequestration and storage in biomass and soil, natural resources, tourism and recreation, freshwater and biodivertiy,	challenges exist in estimating the economic avalues derived from ES, but seen as a tool to evaluate development plans with regard to environmental concerns, ES should be considered in landscape planning	Code 2.3	Code 4.2
19	Grunewald V.K.; Syrbe R.-U.; Walz U.; Wende W.; Bastian O.; Meier S.; Zieschank R.	National indicators for evaluating ecosystems and their services – Nationwide orientation framework for landscape planning and information base for federal policy; [Nationale Indikatoren zur Bewertung von Ökosystemen und deren Leistungen: Bundesweiter Orientierungsrahmen für Landschaftsplanungen und Informationsgrundlage für die Bundespolitik]	National indicators for evaluating ecosystems and their services – Nationwide orientation framework for landscape planning and information base for federal policy Planning requirements relate to spatial design goals as well as usage, protection, and revitalization decisions. Now and in the near future, nationwide strategies are needed for protecting open spaces, for soil and climate protection, c…	Journal artical	Naturschutz- und Landschaftsplanung	Scopus	10.1399/NuL.2022.02.01	2022	Leibniz-Institut für ökologische Raumentwicklung	Germany	Dresden	Male	German	Germany	Recommendation and framework paper	literature analysis	Discursive	Theoretical	role of ecosystem service evaluation and integration of these into landscape planing in Germany, landscape use needs decision tools, especially the safeguarding of open spaces is necessary for the soil and climate protection, adaptation for climate change and biodiversity conservation. also planning frameworks for the development of renewable energies are helpful to come to strategic decisions,	landscape planning in Germany is federal topic, Ecosystem Services in Germany in practical integration, hardly existing, reasons, differend terminology between existing planning documents and ecosystem service concept, high complecity, quantity and quality of impact needs to be assessed, lack of data, and high effort in different Ecosystems for data-monitoring, usw., high value in Germany of SUP …	Code 2.2	Code 4.2	Code 4.1
20	Gulinck, H; Marcheggiani, E; Verhoeve, A; Bomans, K; Dewaelheyns, V; Lerouge, F; Galli, A	The Fourth Regime of Open Space	This article reinterprets open space as the theatre of adaptive regimes in the interfering wakes of two major waves of transformation: the agricultural and the urban transformation. The aim of the wave regime concept is to accommodate traditional and emerging land uses in a logical scheme of co-existing regimes separated by transition waves in space and time. Each wave corresponds to a transition…	Journal article	Sustainability	both	10.3390/su10072143	2018	University of Leuven	Netherlands	Leuven	Male	English	Abstract	Comment	literature analysis	Discursive	Theoretical	open spaces, as unsealed soil and non-urbanised land squeezed between challenge of reduced availability and increased responsibility for much diversified land use and for enhanced sustainabliity and resilience, asks for alternative concepts of open space and its land use. at the moment predominant agricultural interpretation of rural spaces. "neo-rural" concept as an attempt to break through the …	multifunctionality in spatial planning to minimise mutual conflicts and damage in land use. Open spaces are functional, cultural and spatial principles and transformations with the explicit objective of maintaining or regaining sustainability and resilience (generally regimes and paradigms, transformations of mind-sets for open spaces needed, superseeding of old planning principles will be foster…	Code 2.3	Code 1.1	Code 4.2
21	Hasslacher, P	The protection of Alpine open spaces and the Alpine Convention - a timeline	No Abstract	Special isssue	Eco.mont	both	10.1553/eco.mont-9-sis98	2017	CIPRA Austria	Austria	No data	Male	English	Alpine Convention	Comment	literature analysis	Discursive	Theoretical	role of Alpine open spaces and alpine convention, 1991, the Alpine Convention was signed in Salzburg, deals with the pressure of land use,	spatial pressures do not show up in the declaration spatial planning and sustainable Development or Agreements of the XIV. Aline Conference. , no group takes on this key conflict of land use conflicts and landscape protection, lack of protection of Alpine open spaces within Alpine spatial planning in Alpine Convetion, but the topic is reintroduced into scientific spatial planning debates. followi…	Code 3.2	Code 4.1	Code 4.2
22	Herrera C.	In search of the territorial land resource in mountain areas; [A la recherche de la ressource foncière territoriale sur les territoires de montagne]	No Abstract	Journal article	Journal of Alpine research/Revue de Geographie Alpine	Scopus	10.4000/rga.1197	2010	Université Joseph Fourier	France	Region Rhone-Alpes	Female	English	Abstract	Comment	literature analysis	Discursive	Theoretical	spatial planning not always in coherence with land use management, e.g. more towards agriculture but difference in mountain areas where winter tourism has developed.	Problems of mountain areas: attractive in terms of tourism and new residential areas, also physical characteristics considerably restrict the availability of agricultural and building land, pressures, multifunctional use within nature park, Solidarity and Urban Renewal law (SRU) of 13th of December 2000 marked beginning of a new approach to dealing with the question of land at the level of the pa…	Code 4.2	Code 4.1	Code 1.1
23	Hill, M.	Adaptive Capacity of Water Governance: Cases From the Alps and the Andes	The Alps and the Andes are both considered water towers in their respective continents and are thus significant not only for their own water needs but also for those of lowland regions farther downstream. As climate change impacts on the hydrology of mountain regions are increasingly observed, attention is turning to the adaptive capacity of the water governance regimes in mountain communities. T…	Journal article	Mountain Research and Development	Web of Science	10.1659/MRD-JOURNAL-D-12-00106.1	2013	University of Geneva	Switzerland	Geneva	Female	English	Alpine Convention	Case studies	mixed-methods	Case study	Empirical	Alps considered as "Water towers" for respective continents, will be affected disproportionately by climate change: glacier retreat, precipitation patterns, snow lines and associated changes in runoff regimes, mountain regions are a major watershed resource for more than half of the world's population for hydroelectricity, drinking supplies or other water resources, connected to rising global wat…	updating of plans, relevant soon, what is the status quo?, long-term perspectives needed	Code 1.1	Code 4.2	Code 4.1
24	Hladnik, D	Spatial structure of disturbed landscapes in Slovenia	On the basis of land use maps, remote sensing techniques and GIS a spatial model was established to determine landscape types in Slovenia, specifically core areas of the primary forest and spatial structure of agricultural areas with intensive agricultural production. Forest and forested landscapes in Slovenia encompass 72% of the country’s surface area. Using the spatial model, open space withou…	Journal article	Ecological Engineering	both	10.1016/j.ecoleng.2004.12.004	2005	University of Ljubljana	Slovenia	Ljubljana	Male	English	Slovenia	Case study in Slovenia with GIS modelling	quantitative	Secondary data analysis	Empirical	anthropogenic disturbances interact with natural disturbances. Human-managed, semi-natural, and agricultural landscapes comprise the majority of the total open landscape area of the globe, landscape disturbance is caused by any land use that alters landscape heterogeneity	with land use changes difficulties aries to preserve the present cultural landscape andidentity	Code 3.1
25	Hladnik, D; Nastran, M	Landscape Structure and Fragmentation: Key Factors in the Characterisation of Urban and Peri-Urban Forests in Slovenia	Urban and peri-urban forests are strongly influenced by urbanisation and infrastructuredriven development. The main objective of the study is to evaluate and assess key factors characterising of urban and peri-urban forests in Slovenian regions with large differences in landscape fragmentation, from the Pannonian Plain to the Alps and the Mediterranean Sea. To assess landscape fragmentation and p…	Journal article	Land	both	10.3390/land12111968	2023	University of Ljubljana	Slovenia	Ljubljana	Male	English	Slovenia	Case study on forests	quantitative	Secondary data analysis	Empirical	Forest management plans as good tools for assessing ecosystem services, high pressures by settlement and infrastructure	pressures and relevance of tools	Code 2.2	Code 2.3
26	Huber, R; Rigling, A; Bebi, P; Brand, FS; Briner, S; Buttler, A; Elkin, C; Gillet, F; Grêt-Regamey, A; Hirschi, C; Lischke, H; Scholz, RW; Seidl, R; Spiegelberger, T; Walz, A; Zimmermann, W; Bugmann, H	Sustainable Land Use in Mountain Regions Under Global Change: Synthesis Across Scales and Disciplines	Mountain regions provide essential ecosystem goods and services (EGS) for both mountain dwellers and people living outside these areas. Global change endangers the capacity of mountain ecosystems to provide key services. The Mountland project focused on three case study regions in the Swiss Alps and aimed to propose land-use practices and alternative policy solutions to ensure the provision of ke…	Journal article	Ecology and Society	both	10.5751/ES-05499-180336	2013	Swiss Federal Institute for Forest, Snow and Landscape Research WSL	Switzerland	No data	Male	English	Swiss Alps (Jura Vaudois, Davos, Visp region)	Synthesis and case study in Mountland project	mixed-methods	Case study	Empirical	Mountains as "undervalued ecological backbone of Europe" (Hazeu et al. 2010), provide essential ecosystem services for mountain dwellers and people living outside these areas, but the capacity of mountain ecosystems to provide key sercices is at risk, global warming, and political decision-making at different levels will affect land-use. (also effecting provision of Ecosystem goods and services (…	implementation of policies depends massively on existing policy networks	Code 2.2	Code 4.2	Code 3.2
27	Job, H; Mayer, M; Kraus, F	The Best Idea Bavaria Ever Had: the Alpenplan. Land Use Planning of Vision	The Alpenplan (AP) was implemented as an area-wide zoning tool for the Bavarian Alps in 1972. The AP regulates transport infrastructure and leads tourism development towards stronger sustainability. Its top-down approach is based on the rational, technocratic planning paradigm of the 1970s unlike today’s governance approaches which are mostly footed on bottom-up concepts. As the empirical results…	Journal Article	GAIA	both	10.14512/gaia.23.4.9	2014	University of Wuerzburg	Germany	Wuerzburg	Male	German	Bavarian Alps (Alpenplan)	Empirical instruments report	quantitative	Secondary data analysis	Theoretical	near natural areas the Alps: high value of ES, recreational purposes, touristic masses arrive in the Alps, sustainably speaking, traffic infrastructural development was stopped due to the AlpenPlan, lack in evaluation of effectivity and actuality of AlpenPlan. (historical aspects of the Alps and the AlpenPlan, measurement regarding installation of ski-lift-infrastrucute. haltered, and also impact…	lack of upto date instruments, difficult perceptions of existing regulations	Code 3.2	Code 2.2	Code 4.1
28	Job, Hubert; Meyer, Constantin; Coronado, Oriana; Koblar, Simon; Laner, Peter; Omizzolo, Andrea; Plassmann, Guido; Riedler, Walter; Vesely, Philipp; Schindelegger, Arthur	Open Spaces in the European Alps-GIS-Based Analysis and Implications for Spatial Planning from a Transnational Perspective	This article presents an open space concept of areas that are kept permanently free from buildings, technical infrastructure, and soil sealing. In the European Alps, space is scarce because of the topography; conflicts often arise between competing land uses such as permanent settlements and commercial activity. However, the presence of open spaces is important for carbon sequestration and the pr…	Journal Article	land	both	10.3390/land11091605	2022	University of Wuerzburg	Germany	Wuerzburg	Male	English	Alpine Convention	Case study and GIS-methodology report	quantitative	Secondary data analysis	Empirical	Localisation of open spaces on a watershed basis, high pressures on open spaces due to soil sealing, settlement, usage for technical infrastructure, climate change effects, also energy transition, inhomogenity: peripherals areas are partly characterisable by population decline and abandonment of agricultural land uses such in Friuli-Venezia-Giulia, Italy, and processes of urbanization and urban s…	different understandings of open space, often "negative definition" of open space as not predominantly developed free of disruptive infrastrcture or at lesast with only a small proportion of not more than 20 percent., cross-border analyses are needed for nature conservation and water protection. hardly any open spaces left that are completely free from human use, but near-natural areas do exist.	Code 1.1	Code 3.1	Code 4.2	Code 3.2
29	Job, Hubert; Willi, Gero; Mayer, Marius; Putz, Marco	Open Spaces in Alpine Countries: Analytical Concepts and Preservation Strategies in Spatial Planning	Open spaces in the Alps are becoming noticeably scarcer, and the long-term consequences for humans and the environment are often overlooked. Open spaces preserve ecosystem services but are under pressure in many Alpine valleys due to demographic and economic development as well as corresponding technical and tourism infrastructure. This article conceptualizes and measures open spaces in Alpine en…	Journal Article	Mountain Research and Development	both	10.1659/MRD-JOURNAL-D-20-00016.1	2020	University of Wuerzburg	Germany	Wuerzburg	Male	English	Alpine Convention	Analytical framework and open space review	quantitative	Secondary data analysis	Theoretical	extra-urban open spaces, are particularly endagered and are crucial for the protection of biodiversity, fertile soil and ecological connectivity, open spaces are located in the so-called permanent settlement, open space concepts exist, e.g. wilderness areas, mesh size, remote areas, ecological connectivity, alpine wide cross-border coooperation is needed, definition: opensapces originally appeare…	Decrease of quantity of open spaces in the Alps with long-term consequences (further literature), highest risk: increasing land consumption	Code 2.3	Code 2.2	Code 4.2
30	Kruse, S; Pütz, M	Adaptive Capacities of Spatial Planning in the Context of Climate Change in the European Alps	This study delivers empirical evidence regarding the adaptive capacities of spatial planning systems and related factors both supporting and hindering climate change adaptation in the European Alps. Many international and national adaptation strategies consider spatial planning an important policy field for climate change adaptation. Existing adaptation studies, which focus on spatial planning, s…	Journal Article	European Planning Studies	both	10.1080/09654313.2013.860516	2014	Swiss Federal Institute for Forest, Snow and Landscape Research WSL	Switzerland	Birmensdorf	Male	English	Alpine Convention	Study in European Alps	mixed-methods	Case study	Empirical	spatial planning is one of the policy fields affected by climate change, impacts on land use and ecosystems and increasing the risk for some natural hazards, but spatial planning is viewed a the policy field with the instruments necessary to respond to land-use changes and reduce the risk of natural hazards and thus to govern adaptation to climate change impacts. understanding adaptation requirem…	adaptation measures for climate adaptation oftentimes lack: leadership, resources and communication as well as information, spatial planning can (according to Climate Action Plan of Alpine convention) : define risk areas, reinforce hazard management and adaptive capacities and improve puzblic awareness of climate change, climae impact affect spatial planning by impacting urban areas, land-use cha…	Code 2.3	Code 4.2
31	Mann, Stefan	Institutional causes of urban and rural sprawl in Switzerland	Open space is a very scarce resource in Switzerland. The Federal Government aims to stabilize the use of settlement area per resident at 400m2. This paper starts by outlining the institutional system of spatial planning in Switzerland. Regressions then explain both the current level of land use per resident aswell as the development of this indicator. Factors like cars per resident, the proportio…	Journal Article	Land Use Policy	both	10.1016/j.landusepol.2008.11.004	2009	Federal Research Station Agroscope Reckenholz Tänikon	Switzerland	Tänikon	Male	English	Switzerland	Outline of institutional system of spatial planning in Switzerland	mixed-methods	Case study	Empirical	open space as a scarce resource in Switzerland, land use also increases per reisdent, hardly any instruments exist to steer land use beyond local level, upcoming constructrion projects as a threat to open spaces, rural sprawl, federal law in Sitzerland defines way zones can be converted, most difficult in case of forstes, quota of arable land to be maintained for each canton, may not be converted…	As long as enough farmland is available in a municipality, there is little to prevent the local administration from converting teh land to construction zone, questions of profitability of landowner, system change needed in spatail planning	Code 1.1	Code 4.1
32	Marzelli, S; Lintzmeyer, F	TRANSNATIONAL NEEDS OF SUSTAINABLE SPATIAL DEVELOPMENT IN THE ALPS: RESULTS FROM AN ANALYSIS OF POLICY DOCUMENTS	Spatial planning documents referring to the Alps address the needs of transnational spatial development. This article presents selected results from an analysis of thirty-two spatial planning strategies, plans, and reports carried out within the European Transnational Cooperation and Alpine Space Programme's WIKIAlps project (2007–2013). The results include a quantitative analysis of the dimensio…	Journal Article	Acta geographica Slovenica	Web of Science	10.3986/AGS.1585	2015	Ifuplan (Institute for Environmental Planning and Spatial Development	Germany	Munich	Male	English	EUSALP	document and planning document annalysis for spatial planning documents and spatial developments	literature analysis	Discursive	Theoretical	screening of most relevant national and regional spatial planning documents of the Alpine countries ads well of documents of spatial relevance. Added value of transnational spatial development, in management of natural resources and ecosystems, topics of water management (9 each country), spatial planning and development (12 in total),	obstacles exist mostle in administrative, legal, and cultural differences, lack of cross-border coordination, data and knowledgee	Code 4.2
33	Mayer M.	Protected areas in the Alps; [Schutzgebiete in den Alpen - zwischen Bewahrung und Dynamik]	„Ein Gebirge braucht unsere Hilfe“. Mit dieser Formulierung stellte eine Naturschutzorganisation 2011 die Alpen als Naturraum dar, der vor zu starken menschlichen Einflüssen geschützt werden müsse. Dies ist nur einer von mehreren, oft widersprüchlichen Gründen für die Ausweisung von Schutzgebieten in den Alpen. Dieser Beitrag fasst Entwicklung, Umfang und ausgewählte Effekte der Schutzgebiete der…	Journal Article	Geographische Rundschau	Scopus	No Data	2022	University of Innsbruck	Austria	Innsbruck	Male	German	Alpine Convention	report and synthesis of development of impacts on protected areas	literature analysis	Discursive	Theoretical	a lot of times, paradox land scape requirements, cultural landscape gets misinterpreted as natural landscape, no wilderniss exists, protection of open spaces and their ecosystem services as one perspective of what needs to be protected within the alpine landscape, to serve different causes: climate protection, habitat connection and to preserve recreational spaces., do not have to be cultural lan…	Island-effect for protected areas	Code 2.2	Code 3.1
34	Mertens, E; Stiles, R; Karadeniz, N	Green May Be Nice, but Infrastructure Is Necessary	Green infrastructure is presented as a novel and innovative approach in the current environmental planning discourse, but how new is it really? An historical overview of planning ideas in both the urban and the rural contexts indicates that the concept, if not the term, “green infrastructure” has a very long and distinguished pedigree in the field of landscape and open space planning. To determin…	Journal Article	land	both	10.3390/land11010089	2022	Neubrandenburg University of Applied Sciences	Germany	Neubrandenburg	Male	English	Abstract	synthesis report on planning documents	literature analysis	Discursive	Theoretical	green infrastructure combines multifunctional uses in the space. Retain groundwater, and more, to be used in rural open spaces	insufficient care of green and open spaces , problems in budgets.	Code 3.2	Code 3.1
35	Meyer, C; Job, H; Knoll, L	Longitudinal Analysis of Alpine Settlement Geography: The Tegernsee Valley, Bavaria	In this article, land use change in the Tegernsee Valley in Upper Bavaria (Germany) is examined using a longitudinal analysis over 200 years. In doing so, it takes up a study by the Munich geographer Karl Ruppert from 1962. In the Tegernsee Valley, a strong change in land use has already been observed historically. The increaing settlement development can be interpreted as a result of tourism dev…	Journal Article	Mitteilungen der Österreichischen Geographischen Gesellschaft	both	10.1553/moegg164s283	2022	Akademie für Raumentwicklung in der Leibniz-Gemeinschaft (ARL)	Germany	Hannover	Male	German	Tegernseer Tal (Bavaria)	Case study in Bavaria, Tegernseer Tal	mixed-methods	Case study	Empirical	soil is an ending resource, limited settlement area in topographically highly influences alpine environment	loss of open spaces due to settlement pressures and also on valuable ecosystems,	Code 1.1		Code 2.2
36	Meyer,C; Job, H.	Developing a data-driven approach to climate-proof a regional spatial planning instrument: the Bavarian Alpenplan	This article develops a data-driven methodological analysis for the enhancement of a regional spatial planning instrument, the Alpenplan in the German federal state of Bavaria, regarding adaptation to climate change and the prevention of natural hazards. The approach considers six criteria related to climate risk: water retention potential of soils, extreme flood risk, forests for protection of s…	Journal Article	eco.mont	Scopus	10.1553/eco.mont-16-2s16	2024	Akademie für Raumentwicklung in der Leibniz-Gemeinschaft (ARL)	Germany	Hannover	Male	English	Bavarian Alps (Alpenplan)	Case study on the Bavarian AlpenPlan	quantitative	Secondary data analysis	Empirical	climate-proofing a regional spatial plan	upgrade of plans needed, intensification and protection of "open spaces" needs to be enhanced to prevent hazards	Code 4.2
37	Monteiro, AT; Fava, F; Hiltbrunner, E; Della Marianna, G; Bocchi, S	Assessment of land cover changes and spatial drivers behind loss of permanent meadows in the lowlands of Italian Alps	The loss of permanent meadows in the lowlands of the European Alps due to land use/land cover changes is a major underestimated process, which affects the status of these habitats and their provision of ecosystem services. In the Italian Valtellina valley (80km2) change detection analysis estimated meadows loss and spatial bivariate analysis and GIS-based logistic regression model analysed the sp…	Journal Article	Landscape and Urban Planning	both	10.1016/j.landurbplan.2010.12.015	2011	University of Milano	Italy	Milano	Male	English	Middle Valtellina	Case study in lowlands of Italian Alps	quantitative	Secondary data analysis	Empirical	loss of grasslands due to alterations in land use/land cover affect the status of ecosystems worldwide	also loss of local farming systems,	Code 1.1
38	Mose I.	Alps focus - an introduction; [Brennpunkt Alpen - Zur Einleitung]	The European Alps - a focal point of discussion	Journal Article	Berichte zur deutschen Landeskunde	Scopus	No Data	2003	University of Vechta	Germany	Vechta	Male	English	EUSALP	commentary on land use conflicts in Alps	literature analysis	Discursive	Theoretical	land use pressures in Alps, lots of traffic (transit traffic) and tourism,	solutions not in acting against but with Europe	Code 1.1	Code 4.2
39	Peccol E.; Pellegrini M.; Pascolini M.	A Green Infrastructure in the Guidelines to Limit Land Consumption of the Friuli Venezia Giulia Regional Landscape Plan	Land consumption still represents a real threat to the landscape of some Italian regions, like Friuli Venezia Giulia (FVG), that are without specific national and regional laws to limit land take. Regional landscape plans are essential planning tools for landscape protection and management and, among their objectives, pursue the enhancement of landscape quality and the containment of land consump…	Book Chapter		Scopus	10.1007/978-3-030-54345-7_6	2021	University of Udine	Italy	Udine	Female	English	Friuli Venezia Giulia Region	Case study on the Friuli Venezia Giulia Regional Landscape Plan	literature analysis	Discursive	Theoretical	How the Regional Landscape Plan tackles land take		Code 4.2
40	Pehlke, D.	Regional planning steering types of residential development in Germany. A nationwide analysis of planning instruments in all German planning regions; [Raumordnerische Steuerungstypen der wohnbaulichen Siedlungsentwicklung in Deutschland. Eine bundesweite Analyse der eingesetzten Planungsinstrumente in allen deutschen Planungsregionen]	Obwohl die Steuerung der regionalen Wohnbaulandentwicklung eine klassische Aufgabe der Raumordnung ist, liegen bislang keine flächendeckenden Informationen zum Einsatz aller hierfür wesentlichen Planungsinstrumente in den Regionalplänen vor. Auch für mögliche Steuerungstypen existiert bisher nur ein Ansatz auf Bundesländerebene. Zur Verringerung dieses Informationsdefizites wurde zunächst mithilf…	Journal Article	Raumforschung und Raumordnung	Scopus	10.14512/rur.111	2024	BBSR	Germany	Bonn	Male	German	Germany	Synthesis on planning instruments	literature analysis	Discursive	Theoretical	aims on soil consumption exist, with 30ha-goal per day reduction of soil and land take, e.g. Grünzüge Regional		Code 4.1	Code 2.2
41	Peterlin, M.	Territorial Coordination or Territorial Governance? The Case of the Alpine-Adriatic Area	This paper argues that in order to achieve better coordination in dealing with spatial development across borders, the current focus on territorial governance and organizational structures in the Alpine–Adriatic area might not be the right answer to the present situation. Currently, the focus in the area is shifting to the formal aspects of cooperation but, the paper argues, territorial coordinat…	Journal Article	disP- The Planning Review	both	10.1080/02513625.2010.10557113	2010	iPoP	Slovenia	Ljubljana	Male	English	Alpine-Adriatic Area	commentary report on cross-border coordination	literature analysis	Discursive	Theoretical	cross-border cooperation is highly relevant in spatial planning		Code 4.1	Code 4.2
42	Pristeri, G; di Martino, V; Ronchi, S; Salata, S; Mazza, F; Benedini, A; Arcidiacono, A	An Operational Model to Downscale Regional Green Infrastructures in Supra-Local Plans: A Case Study in an Italian Alpine Sub-Region	In recent years, green infrastructure (GI) has increasingly become a strategic tool to integrate ecosystem services in spatial planning at different scales. GI has the potential to foster the achievement of environmental targets and landscape enhancement promoted by several planning instruments that act at different territorial scales. Despite this, the combination of the GI strategy with other o…	Journal Article	Sustainability	both	10.3390/su151511542	2023	Politecnico di Milano	Italy	Milano	Male	English	Media and Alta Valtellina (Lombardy)	Modelling for spatial plans	quantitative	Secondary data analysis	Empirical	how to downscale GI from regional to local scale? GI as a tool to provide ecosystem services in spatial planning at different scales. GI also defined in the 2013 Green Infrastructure strategy, GI follows five principles, integration and considering the gey-green combination of GI, multifunctionality which includes the ecological, social nad dconomic function of green spaces, connectivity between …		Code 4.1	Code 2.1
43	Ramel, C; Rey, PL; Fernandes, R; Vincent, C; Cardoso, AR; Broennimann, O; Pellissier, L; Pradervand, JN; Ursenbacher, S; Schmidt, BR; Guisan, A	Integrating ecosystem services within spatial biodiversity conservation prioritization in the Alps	As anthropogenic degradation of biodiversity and ecosystems increases, so does the potential threat to the supply of ecosystem services, a key contribution of nature to people. Biodiversity has often been used in spatial conservation planning and has been regarded as one among multiple services delivered by ecosystems. Hence, biodiversity conservation planning should be integrated in a framework …	Journal Article	Ecosystem Services	both	10.1016/j.ecoser.2020.101186	2020	University of Lausanne	Switzerland	Lausanne	Female	English	Alpine Convention	Mapping ecosystem services	quantitative	Secondary data analysis	Empirical	ES Total economic value in already highly protected areas is high versus other land use types	lack of priority areas for Ecosystem service and biodiversity in lowland areas , likely due to urbanized areas presences in these areas causing also lower biodiversity,	Code 3.1	Code 2.3
44	Riva, Matteo; Kienast, Felix; Gret-Regamey, Adrienne	Mapping open spaces in Swiss mountain regions through consensus-building and machine learning	The rapid expansion of tourism, transportation, energy, and agricultural infrastructure in mountain areas raises concerns about landscape fragmentation and impacts on aesthetic values. Effective delineation of these areas relies on negotiating various qualities that define them. In our study, we developed a collaborative consensusbuilding process with experts to map open spaces. Rather than colle…	Journal Article	Applied Geography	both	10.1016/j.apgeog.2024.103237	2024	Swiss federal institute of Technology (ETH)	Switzerland	Zurich	Male	English	Swiss Alps	Mapping open spaces through consensus building and machine learning	quantitative	Secondary data analysis	Empirical	landscape pressures exist in mountain regions, existing domincance of infrastructure-dominared landscapes, trade-offs, mapping open spaces as decision support, so far mapping happened with taking into account infrastructure and human presence, give predictors for modeling, significant differences exxist within the mountains, and within different regions,		Code 1.1
45	Sancho Reinoso A.	Spatial planning in mountain areas - Instruments, actors and impacts. A comparison between the Spanish Pyrenees and the Austrian Alps; [Raumplanung im berggebiet - Instrumente, akteure und auswirkungen. Ein vergleich zwischen den Spanischen Pyrenäen und den Österreichischen Alpen]	Spatial planning in mountain areas – Instruments, actors and impacts. A comparison between the Spanish Pyrenees and the Austrian Alps This paper presents a comparative analysis of a mountain area in the Spanish Pyrenees and in the Austrian Alps. The aim is to analyse the impact of spatial planning tools in both study areas by focusing on the political-administrative context as well as certain leg…	Journal article	Mitteilungen der Österreichischen Geographischen Gesellschaft	Scopus	10.1553/moegg155s220	2013	Universität für Bodenkultur Wien	Austria	Vienna	Male	English	Alpine Convention	Comparison of spatial planning between austrian Alps and pyrenees	literature analysis	Discursive	theoretical	European Cooperations supported with alpine convention for spatial planning in mountainous areas in the alps, question of how planning improves the life of the local pupulation. Relevant at local scale in Austria is the Gemeindeplanungsgesetz 8local scale) in Austria, also Landesentwicklungsprogramm, and local "örtliches Entwicklungskonzept" and Flächenwidmungsplan, regulates land usees for const…		Code 4.1
46	Salata, S.	Land take in the Italian Alps: Assessment and proposals for further development	Purpose – Land use change in the Alpine Regions is dominated by two main factors: a process of re-naturalization and a process of expansion for settlements with the relevant occupation of low-valley areas. The purpose of this paper is to present an overview of land take measures in the Lombardy Alpine context and the recent proposals of spatial planning instruments for land resource management. N…	Journal article	Management of Environmental Quality	Scopus	10.1108/MEQ-12-2012-0079	2014	Politecnico die Milano	Italy	Milano	Male	English	Lombardy	Assessment and proposals in the Italian Alps for land take, GIS according to DIAMONT	quantitative	Secondary data analysis	Empirical	habitable area of the Alpine Regions is really naturally restricted, socio-economic metabolism an changes in land use and land cover exist, abandoment of less favorable and less accessible land and more intense use of fertile, favorabel areas, has affected the European mountainous environment, also conversion from pastrure land to forest and from crops to urban developments, management of land re…		Code 4.1	Code 1.1	Code 3.2	Code 2.2
47	Schindegger F.	In the centre of Europe and neverthe less at the edge - challenges for European regional development and regional policy in the Alps; [In der Mitte Europas und doch am Rande - Herausforderungen für europäische Raumentwicklungs- und Regional-politik in den Alpen]	With the forthcoming extension 2004 the Alpine space moves finally into the centre of political Europc. Within the system of the European regional development policies the Alpine region is one of the ncw rnacro-regions. Howcvcr. due to the concentration 011 thc issue of the Alpine convention, thc cornmon interests or thc rnountain arca regarding the protection and the prescrvation of the ecologic…	Journal article	Bericht zur deutschen Landeskunde	Scopus	No Data	2003	No Data	Austria	Vienna	Male	German	Abstract	Strategic report	literature analysis	Discursive	Theoretical	has been recognized, - that traffic cannot be managed with road construction alone - or that agriculture can also have functions other than food production - or that the capacity of ecosystems is the real limit for land management different identities with requests on the soil, ecosystems naturally form the basis for maintaining the Alpine region as a living and economic space. of the Alpine regi…		Code 3.1	Code 4.2
48	Schirpke U.; Leitinger G.; Tasser E.; Rüdisser J.; Fontana V.; Tappeiner U.	Functional spatial units are fundamental for modelling ecosystem services in mountain regions	The application of ecosystem services (ES) models that rely on primary biophysical data is considered as most promising to generate accurate maps for decision making. However, to effectively apply these modelling approaches for ES mapping, representative functional spatial units with distinct socio-ecological characteristics are needed, which allow the upscaling of measured variables from the plo…	Journal article	Applied Geography	Scopus	10.1016/j.apgeog.2020.102200	2020	University of Innsbruck	Austria	Innsbruck	Female	English	Alpine Convention	GIS-modelling for ecosystem services	quantitative	Secondary data analysis	Empirical	Ecosystem-service maps used for decision making and basis to understand and manage ES, In mountainous areas, topography and related climate conditions largely determine the spatial distribution of ecosystem as well as land use/land cover (LULC) types, Consequently, permanent cultures, arable land and intensively used hay meadows can mainly be found in the valley bottom or on lower elevated slopes…	functional spatial units are needed, useful for deciedsion and land use policies	Code 2.3
49	Schirpke U.; Candiago S.; Egarter Vigl L.; Jäger H.; Labadini A.; Marsoner T.; Meisch C.; Tasser E.; Tappeiner U.	Integrating supply, flow and demand to enhance the understanding of interactions among multiple ecosystem services	A comprehensive understanding of the relationships among ecosystem services (ES) is important for landscape management, decision-making and policy development, but interactions among multiple ES remain underresearched. In particular, earlier studies often did not clearly distinguish between supply, flow and demand. Furthermore, the underlying mechanisms in complex socio-ecological systems remain …	Journal article	Science of the Total Environment	Scopus	10.1016/j.scitotenv.2018.09.235	2019	Eurac Research	Italy	Bolzano	Female	English	EUSALP	supply, flow and emand of ES	quantitative	Secondary data analysis	Empirical	Ecosystem services interconnect, drinking water supply in mountainous areas, but demand higher in fringe ares, high interdependency, land use and climatice maps presented,		Code 2.3	Code 3.1
50	Schirpke U.; Tasser E.; Tappeiner U.	Mapping ecosystem services supply in mountain regions: A case study from south Tyrol (Italy)	Mountain regions provide many ecosystem services and spatially explicit assessments have to account for their specific topographic and climatic conditions. Moreover, it is fundamental to understand synergies and trade-offs of multiple ecosystem services. In this study, ecosystem services supply, including forage production, timber production, water supply, carbon sequestration, soil stability, so…	Journal article	Annali di Botanica	Scopus	10.4462/annbotrm-11599	2014	Eurac Research	italy	Bolzano	Female	English	South Tyrol (Italy)	Mapping ecosystem services	quantitative	Secondary data analysis	Empirical	for south tyrol, assessed ecosystem services are mainly related to land use/cover, which in mountain regions is conditioned by topography influencing plant distribution and growth, soil development, soil moisture and nutrient availability, soil provides higher values, quantity of ES depends on land use, water availability limits forage production in wester part of South Tyrol, with the high mount…		Code 2.2	Code 2.3	Code 3.1
51	Špeh, Natalija; Piano, Saša	The Spatial Development Potential of Škale and Velenje Lakes	The research area is the strip of narrow lake land surrounding Velenje and Škale Lakes (in the Northeast Sub-alpine part of Slovenia) which has different potentials that provide opportunities for sustainable development. The primary research goal was to create digital cartographic materials; current land use was displayed (updated in October, 2014 and February, 2015), and land use/land cover cate…	Journal article	HRVATSKI GEOGRAFSKI GLASNIK	Scopus	10.21861/HGG.2016.78.02.05	2016	Faculty of Environmental Protection Velenje	Slovenia	Savinjska	Female	English	Velenje and Skale lakes (Slovenia)	Case study on Velenje and Skale Lakes in Northeast Sub-Alpine Part of Slovenia, land-use monitorin with GIS, questionnaire survey	mixed-methods	Case study	Empirical	Purpose of the paper was finding a set of options for the sustainable development for the study-area (strip of narrow lake land surrounding Velenje and Škale Lakes (former coal mine area) including the lake banks, the hinterland as well as the water surface). They collected current land-use data, evaluated the qualitative and quantiative values of the areas and did a survey to involve other stake…	Sustainable land-use for former coal mining lake-areas.	Code 1.1
52	Stritih, Ana; Senf, Cornelius; Seidl, Rubert; Grêt-Regamey, Adrienne; Bebi, Peter	The impact of land-use legacies and recent management on natural disturbance susceptibility in mountain forests	Mountain forests provide a wide range of ecosystem services, including carbon sequestration and protection from natural hazards. Forest cover in the European Alps has increased over the last century, but in recent years, these forests have experienced an increasing rate of natural disturbances by agents such as windthrow, bark beetle outbreaks, and forest fires. These disturbances pose a challeng…	Journal article	Forest Ecology and Management	both	10.1016/j.foreco.2021.118950	2021	ETH Zurich, Institute for Landscape and Spatial Development, Planning of Landscape and Urban Systems	Switzerland	Zürich	Female	English	Canton Graubünden (Switzerland)	Case study of forest disturbances in Graubünden Switzerland by spatial modelling and Machine learning methods	quantitative	Secondary data analysis	Empirical	The Study investigates the susceptibility to natural disturbances of mointain forests in Graubünden and the linkages to the forest management and land-use legacies. Datasets about forest disturbances in the AOI were combined with information about topography, forest structure and historical forest cover. The introduction gives an overview on the ecosystem services of forest land in the alps but a…	Management intervention should take place early, interactions between site and stand conditions, land use and management history must be taken into account by the forest management.	Code 4.1
53	Svadlenak-Gomez, Karin; Walzer, Chris	Trees, water, wind and sun - Pure nature? How compatible is nature conservation with the expansion of renewable energy use in the Alps?; [Bäume, Wasser, Wind und Sonne - Natur pur? Wie naturschutzverträglich ist der Ausbau erneuerbarer Energienutzung in den Alpen?]	The Alps are well positioned for the use of various renewable energy sources. Utilising renewable energies in the Alps has a long tradition and has shaped the landscape decisively. At the same time, the Alps are rich in species and ecosystems. The use of renewable energy has strongly influenced and changed nature and landscapes in the Alpine region. On the basis of global climate protection effor…	Zeitschriftenartikel	Natur und Landschaft - Zeitschrift für Naturschutz und Landschaftspflege	Scopus	10.17433/9.2017.50153515.458-463	2017	University of Veterinary Medicine, Vienna	Austria	Vienna	Female	Deutsch	EUSALP	Kommentierendes Paper	literature analysis	Discursive	Theoretical	In principle, the Alps are well-suited locations for the expansion of renewable energies (primarily hydropower, use of wood biomass, solar and wind energy). The necessary expansion of renewable energy infrastructure is often incompatible with nature conservation measures, and there are frequently conflicting objectives with negative impacts on nature and the landscape. The effects of the expansio…	Compatibility of nature and species conservation with the expansion of renewable energies in the Alps	Code 1.2	Code 1.1	Code 4.2
54	Walz, Ulrich; Schumacher, Ulrich; Krüger, Tobias	Landscape and forest fragmentation in Germany - Results from monitoring in the context of protected areas and closeness to hemeroby; [Landschaftszerschneidung und Waldfragmentierung in Deutschland - Ergebnisse aus einem Monitoring im Kontext von Schutzgebieten und Hemerobie]	Large, unfragmented open spaces and forests are an important object of conservation, for example for the survival of animal populations, but also for nature-based recreation of people. The aim of this article is to analyse how landscape fragmentation and forest fragmentation have changed in Germany due to supra-local roads and rail traffic routes since 2000, what share large-scale protected areas…	Journal article supplementary article	Natur und Landschaft - Zeitschrift für Naturschutz und Landschaftspflege	Scopus	10.19217/NuL2022-02-04	2022	Hochschule für Technik und Wirtschaft (HTW) Dresden Fakultät Landbau/Umwelt/Chemie	Deutschland	Sachsen	Male	Deutsch	Germany	Vorstellung eines methodischen Ansatzes zur Modellierung und Messung der Landschaftszerschneidung mithilfe von GIS	quantitative	Secondary data analysis	Empirical	The authors first define the terms “undissected open spaces” (UZF), “undissected low-traffic areas” (UZVR) and “undissected functional areas” (UFR). The UZF approach (used in the article) is based on the assumption that interurban roads have a fragmenting effect regardless of their traffic volume. Indicators of landscape fragmentation and forest fragmentation are evaluated with the help of a geod…	Modeling the degree of fragmentation	Code 1.1
55	Wandl, Alexander; Rooij, Remon; Rocco, Roberto	Towards Sustainable Territories-in-Between: A Multidimensional Typology of Open Spaces in Europe	To improve the ecosystem service provided by open spaces in dispersed urban areas is a key challenge for sustainable spatial development in Europe. The typology presented in this article illustrates the different potentials that open spaces in territories-in-between have across 10 cases in Europe. Unlike other typologies, neither function nor form is used for the classification, but the potential…	Journal article	Planning Practice and Research	Scopus	10.1080/02697459.2016.1187978	2017	Department of Urbanism, Delft University of Technology	Netherlands	Delft	Male	English	EU	Spatial analysis of 10 case studies in Territories in Between (TiB) across Europe	quantitative	Secondary data analysis	Empirical	The article focuses on the sustainable development of open spaces in dispersed urban areas/territories-in-between (neither distinctly urban nor rural). It draws on Dupuy's (1991) potential and functions of open spaces (social, environmental, economic aspects). The authors develop a typology of these open spaces in territories-in-between, distinguishing between green open spaces (mostly unsealed, …	Open spaces in territories-in-between are currently underexplored in contemporary spatial planning but hold significant potential for ecosystem services, multifunctionality, and sustainability.	Code 3.1
56	Vincent, Claire; Fernandes, Rui F.; Cardoso, Aha R.; Broennimann, Olivier; Di Cola, Valeria; D'Amen, Manuela; Ursenbacher, Sylvain; Schmidt, Benedikt R.; Pradervand, Jean-Nicolas; Pellissier, oicL; Guisan, Antoine	Climate and land-use changes reshuffle politically-weighted priority areas of mountain biodiversity	Protected areas (PAs) play a critical role in conserving biodiversity and maintaining viable populations of threatened species. Yet, as global change could reduce the future effectiveness of existing PAs in covering high species richness, updating the boundaries of existing PAs or creating new ones might become necessary to uphold conservation goals. Modelling tools are increasingly used by polic…	Journal article	Global Ecology and Conservation	both	10.1016/j.gecco.2019.e00589	2019	University of Lausanne, Department of Ecology and Evolution	Switzerland	Lausanne	Female	English	Lausanne	Case Study in western swiss Alps with species distribution models and zonation methods	quantitative	Secondary data analysis	Empirical	Climate change is altering habitat conditions, causing shifts in the habitats of protected species. This necessitates reevaluating and potentially adjusting current protected areas. The study aims to model habitat changes to identify areas likely to become species-rich due to climate change, guiding better conservation planning. The goal is to find optimal locations for nature reserves to maximiz…	Protected areas are generally static. However, in order to effectively protect endangered species, the protected areas must be moved/adapted in line with changing climatic conditions.	Code 2.2	Code 1.1
57	Sutor, Gertraud; Knoll, Andreas; Voerkelius, Ulrich	Bodenschutz in der oertlichen Raumplanung : Umsetzung des Bodenschutzprotokolls der Alpenkonvention in bayerischen und oesterreichischen Gemeinden	Bodenschutz in der örtlichen Raumplanung im Alpenraum Im Auftrag des Bundesumweltministeriums (BMU) erarbeitete das Büro LAND-PLAN, Ebersberg bei München in Zusammenarbeit mit REGIOPLAN INGENIEURE Salzburg und dem Planungsbüro LÄNGST & VOERKELIUS, Landshut im Rahmen einer transnationalen Kooperation einfach anwendbare Methoden, mit deren Hilfe Kommunen im Alpenraum in die Lage versetzt werden, de…	Project report	-	Web of Science	ISSN 1862-4804	2020	Büro LAND-PLAN	Germany	Munich	Female	German	Tirol, Oberösterreich, Sonthofen	Projektbericht, Summary of Best-Practice Examples	literature analysis	Discursive	Empirical	Projektbericht stellt qualitativen Bodenschutz, Wiederherstellung der natürlichen Bodenfunktionen in den Fokus und bezieht sich dabei auf das Bodenschutzprotokoll der Alpenkonvention. Gibt eine kurze Zusammenfassung der wichtigsten Inhalte des BodP. Es werden benutzerInnenfreundliche Methoden vorgestellt, mit denen der Bodenschutz aktiv in kommunale Prozesse eingebunden werden kann. Zielgruppe si…	Firm anchoring of the BodP of the Alpine Conventions in planning practice (especially public authorities)	Code 1.1	Code 4.1
58	Trentanovi, Giovanni; Campagnaro, Thomas; Rizzi, Andrea; Sitzia, Tomasso	Synergies of planning for forests and planning for Natura 2000: Evidences and prospects from northern Italy	Improvements in the management of Natura 2000 sites are essential to achieve the targets set out bythe Habitats and Birds Directives of the European Union. A current focus is on the development of man-agement plans, which are fundamental instruments in the implementation of conservation measures.This study explores the viability of using existing forest plans to assist in this purpose. As case st…	Journal article	Journal for Nature Conservation	both	10.1016/j.jnc.2017.07.006	2018	Università degli Studi di Padova, Department of Land, Environment, Agriculture and Forestry	Italy	Padova	Male	English	Veneto Region	Case Study of Natura 2000 forest areas in the Veneto Region	quantitative	Secondary data analysis	Empirical	The article discusses forest management and the use of forest plans to manage Natura 2000 sites. Management planning is essential for effective habitat protection, but it's complex, requiring consideration of biodiversity goals, ecological complexity, economic interests, legal boundaries, and social expectations. Forestry is often linked to disturbances in forest ecosystems, affecting their funct…	Use of forest plans for managing Natura 2000 sites	Code 4.1
59	Vanham, Davy; Millinger, Stefanie; Pliessnig, Harald; Rauch, Wolfgang	Rasterised Water Demands: Methodology for Their Assessment and Possible Applications	In this paper a methodology for the calculation of grid cell spatially distributed water demands—for the stakeholders domestic, municipal, industrial and agricultural (without rainfed or irrigated crop production) water use—is presented. As case study the Kitzbühel region in the Austrian Alps, encompassing 20 municipalities, was chosen. Austria is one of few countries within the European Union th…	Book Chapter	Book: Water Resource Management	Scopus	10.1007/s11269-011-9857-3	2011	Institute of Infrastructure, University of Innsbruck	Austria	Innsbruck	Male	English	Kitzbühel (Bavaria)	Case Study of in the Kitzbühel Region, Austrian Alps; detailed rasterised spatial assessement of water demand	quantitative	Secondary data analysis	Empirical	Very detailed/fine-resolution analyses of water demand for different raster cell resolutions (in litre per second). It differentiated between yearly and winter water demand. Water demand is highest in valleys, particularly in town centers and large buildings, while mountain areas and huts show minimal demand. Key stakeholders include residents, tourists, employees, and agriculture. These rasters …	Calculating sptially distributed water demand raster for a certain time step.	Code 2.2	Code 3.1
60	Schneeberger, Nina; Bürgi, Matthias; Kienast, Felix	Rates of landscape change at the northern fringe of the Swiss Alps:: Historical and recent tendencies	There seems to be a general consensus nowadays among the public in many countries that landscape transformation has accelerated drastically. This study examines the question if cultural landscape change has really accelerated during the 20th century on the border of the Swiss Alps. Different cultural landscape change processes, such as the expansion of the built-up area or the road network, and t…	Journal article	Landscape and Urban Planning	both	10.1016/j.landurbplan.2006.06.006	2007	Swiss Federal Research Institute WSL (second author)	Switzerland	Zürich	Female	English	Swiss Alps (Gonten, Alt St. Johann, Wilhaus, Alpnach, Horw, Kriens, Gossau, St. Gallen)	Comparative case study of eight municipalities along the border of the swiss alps/with topographic maps	quantitative	Secondary data analysis	Theoretical	Focus of the paper is on the transformation rates of landscape change. Former approaches to measure landscape changes were rather static, the approach of the authors is more dynamic. They set topography as a key factor affecting the rate of landscape transformation. Most important landscape change processes were: expansion of the built-up areas, growth of the road network towards better accessibi…	Questioning the assumption that cultural landscape change continuously increased throughout the 20th century.	Code 1.1
61	Bätzing, Werner	Bevölkerungs- und Siedlungsentwicklung im Alpenraum zwischen 1870 und 2000	No abstract	Part of text-collection	Umweltbundesamt-TEXTE	References	No data	2002	University of Erlangen	Germany	Erlangen	Male	German	EUSALP	Strategic report	literature analysis	Discursive	Theoretical	Settlement, environemntal and societal pressures in the alps, primarily in valleys that already face high environmental stressors like inversion, fragmentation, soil sealing, loss of biodiversity and landscape diversity, areas for retention in decreasing diverse landscapes increases,	Alpine convention protocols not fairly weighted, alpine convention was founded for protection of environmental aspects, protocol for society is not existent, but discussion for society and culture (2002) to maintain the quality of life in the alps.	Code 1.1	Code 3.2
62	Bätzing, Werner	Ökologische und Sozioökonomische Anforderungen an das Schwerpunktthema der Alpenkonvention "Bevölkerung und Kultur"	No abstract	Part of text-collection	Umweltbundesamt-TEXTE	References	No data	2002	University of Erlangen	Germany	Erlangen	Male	German	Alpine Convention	Strategic report	literature analysis	Discursive	Empirical	Settlement development in the history of the Alps. Dependencies to agglomerations outside of alps and loss of alpine identity, decentralized land use of agrar-industry, in modern society use of valuable land and non-use of "rest area", in the Alps, this disperse situation shows with the increase of growth-regions and "degrowth" regions since 1951, small-scale disparities, ewspecially in aras with…	discrepancies, own inner-alpine economy and knowledge needs to be strengthed for also maintaining ecosystem service flow to outer-alpine areas	Code 3.1	Code 2.3	Code 1.1
63	Capello, R., Cerisola, S.	Competiveness through integration in the European Union Strategy for the Alpine Region. A "balanced development" approach	In the last 10 years, the European Union has devoted specific attention and resources to the establishment of macro-regional strategies, with the objective of joining together transnational areas to favour the effective and organized management of common challenges. In most macro-regions, however, the identification of strategies to increase competitiveness is a rather difficult task, given the e…	Journal article	European Planning Studies	References	10.1080/09654313.2019.1588860	2019	Politecnico die Milano	Italy	Milano	Female	English	EUSALP	Strategic approach synthesis for efficient european strategy development	literature analysis	Discursive	Empirical	in the agricultural development pattern, on average cultural events are not exploited efficiently (Table 1). However, regions with an abundant endowment of this asset are able to exploit it efficiently, as shown by the interaction term between the dummy and the cultural events variable (Table 3, column 1). Additional resources that allow to overcome the inefficient use of the key asset in the agr…	Questions of ecological conciousness and identity for trans-alpine approach, cross-border cooperation is viewed as crucieal even thoug hbeing difficult.	Code 4.2	Code 4.1
64	Chilla, T., Heugel, A., Streifeneder, T.	The Alps 2050 Atlas. Alps 2050 Common Spatial Perspectives for the Alpine area:Towards a common vision	No abstract	Book report	ESPON	References	978-99959-55-66-3	2019	University of Erlangen	Germany	Erlangen	Male	English	EUSALP	Strategic report	literature analysis	Discursive	Empirical	Population change, economy, ecology, Energy, climate change, Transport, european perspective, Governance and territorial structures as main topics the Alps deal with, the topic of soil sealing in the Alps: Within the Alpine Convention perimeter soil sealing is less than outside due to the big agglomerations of the urban areas Lyon, Toino, Milano, Verona, Vienna, Linz and Munich being outside of t…		Code 1.1	Code 2.2
65	Domhardt, H.-J.	Steuerung des Siedlungsflächenwachstums durch raumordnerische Instrumente des Freiraumschutzes in Regionalplänen	No Abstract	Journal article	Informationen zur Raumentwicklung	References	No data	2005	University of Kaiserslautern	Germany	Kaiserslautern	Male	German	Germany	Report analysis on instruments	literature analysis	Discursive	Empirical	The regional planning system is of main importance in managing settlement developments, whilst national and federal documents (Germany) mainly propose programmatic content, (§ 7 Abs. 2 ROG), measures exist for managing settlement, such as: "Raumkategorien", "Zentrale Ort", "Topics of importance", Settlement development", and "Axes", as well as existing benchmarks for population and for grwoth of …	inefficient simbology in maps. Raumnutzungsansprüche auf multifunktionaler Ebene ohne Abwägung, required is target-definition in spatial planning, as this is the only way to achieve binding capacity. Quantititively speaking, Regional green belts are not really useful to manage quantitative settlement development.efficiency of spatial planning instruments only shows in clonflicts.	Code 3.2	Code 1.1	Code 4.2
66	Hasslacher, P.	Die Alpenkonvention. Markierungen für ihre Umsetzung	No abstract	Book	Alpine Raumordnung - Fachbeiträge des Österreichischen Alpenvereins	References	No data	2004	Österreichischer Alpenverein	Austria	Innsbruck	Male	German	Alpine Convention	Book	literature analysis	Discursive	Empirical	Cuypers: Protocols are to be understood as binding law, good tool for sustainable development, massively discussed is the content in protocol for soil protection regarding the installation of skiing infrastructure. Norms and questionability of efficiency. different wording in other language version results in different interpretations. but cases show nevertheless the usefullness of alpine-wide st…		Code 3.2	Code 4.1
67	Hiess, H., Job, H., Kuncio, P.	Alpine Raumordnung. Ein Raumentwicklungskonzept für den Alpinen Raum	No abstract	Book	Alpine Raumordnung. Ein Raumentwicklungskonzept für den Alpinen Raum	References	No data	2022	CIPRA Austria	Austria	Vienna	Male	German	EUSALP	Book	literature analysis	Discursive	Empirical	Tischler: Alpine spatial planning and alpine convention; Meyer & Job: pressures on alps, limited topography, limitation of permanent settlement area, in times of flooding, soil erosion is of high importance. Settlement, ecology, traffic as main pressures, as well as tourism, energy, climate and risk, regional disparities, and cross-border cooperation, open spaces should be used more frequently an…		Code 1.1	Code 4.1
68	Job, H., Mayer, M., Haßlacher, P.	Analyse, Bewertung und Sicherung alpiner Freiräume durch Raumordnung und räumliche Planung	No abstract	Journal	Forschungsberichte der ARL	References	978-3-88838-084-6	2017	University of Wuerzburg	Germany	Wuerzburg	Male	German	EUSALP	Journal report analysis and evaluation of alpine open sapces and spatial planning	literature analysis	Discursive	Empirical	Alps as important for ecosystem services (Water, groundwater, aesthetic), of continental value, with a highly influenced cultural landscape, open spaces as areas outside of permanent settlement areas,but not in unreachable high areas, dependencies between alpine areas and valley areas, , focus on skiing area, preservation of open space is of high value for safeguarding the natural heritage, lands…	problem is further "Erschließung" of open spaces for skiing areas	Code 2.2	Code 2.3	Code 2.1	Code 4.2
69	Meinel, G.	Geobasisdaten. Grundlage für die Berechnung von Indikatoren zur Siedlungs- und Freiraumentwicklung	In dem Beitrag werden das Konzept und erste Realisierungsergebnisse eines Monitors vorgestellt, der Zustand und Entwicklung von Siedlungs- und Freiraumstruktur in Deutschland beschreibt. Grundlage ist das ATKIS Basis-DLM, dessen Geobasisdaten einer gesetzlichen Fortschreibung unterliegen. Dieses digitale Landschaftsmodell ist der aktuellste und genauste topographische Datensatz, der fl ächendecke…	Book chapter	Flächennutzungsmonitoring. Konzepte - Indikatoren - Statistik	References	978-3-8322-8740-5	2009	Leibniz-Institut für ökologische Raumentwicklung	Germany	Dresden	Male	German	Germany	Concept report	literature analysis	Discursive	Theoretical	Indicators used to monitor open space: space between settlement and traffic areas (ATKIS-Basis-DLM), Nature protection areas, closeness of space according to land use, effectiv mash width, closeness of biotopes in open space ("Offenland"), noise pollution, Infrastructure in nature protection ares, recreation areas.		Code 3.1
70	Pütz, M., Job, H.	Governance und Regionalentwicklung in Großschutzgebieten der Schweiz und Österreichs	The article investigates large protected areas from a governance research perspective. The analytical focus is on regional governance regimes of selected large protected areas in Austria and Switzerland. The analysis characterizes structures and patterns of regional governance regimes. Also, the kind and quality of cooperation between the actors is assessed. The article contributes to a deeper un…	Journal article	Raumforschung und Raumordnung	References	10.1007/s13147-016-0451-2	2016	Eidgenössische Forschungsanstalt für Wald, Schnee und Landschaft, WSL	Switzerland	Birmensdorf	Male	German	Austria (NP Zirbitzkogen-Grebenzen; BR Lungau/Nockberge); Switzerland (NP Thal; BR Entlebuch)	Governance report	literature analysis	Discursive	Empirical	Governance in protected areas in Switzerland and Austria, planning and sectoral actors need to communicate efficiently. In land use question, different institutional actors also come together, protection of protected areas is necessary, to manage better the land use pressures also outside of protected areas. cooperation of regionally effective planning is not really highly present as the regional…		Code 4.1	Code 3.2	Code 4.2
71	Rudaz, G.	Territorial redefinition and the gouvernance of mountain regions	The claim that mountain regions have a specific character is today at the heart of a number of collective actions. The process of distinguishing territories redefines the status of mountain areas, reformulates the issues and content of projects that concern them, and redefines the actors involved and the relations they foster. All these changes have implications for the governance of territories.…	Journal Article	Journal of Alpine research/Revue de Geographie Alpine	References	https://doi.org/10.4000/rga.866	2009	Massachusetts Institute of Technology	USA	Massachusetts	Male	English	Alpine Convention	Comparative docuemnt study on Alps and role of Alpine Convention and Sierra Nevada US	literature analysis	Discursive	Theoretical	identity questions of alpine population, who manages and what happens locally.	lack of understanding and knowledge upon documents of Alpine convention, that took upon the question of management for the Alps	Code 3.2
72	Plassmann, Guido; Kohler, Yann; Badura; Marianne; Walzer, C.	Alpine Nature 2030 - Creating (ecological) connectivity for generations to come.	The Federal Ministry for the Environment, Nature Conservation, Building and Nuclear Safety considers the creation of an ecological network in Europe to be crucial for achieving a global network of protected areas as envisaged in the Convention on Biological Diversity (CBD). In this context, the spatial connectivity of protected areas and transboundary protected areas plays an important role in th…	Book	Federal Ministry for the Environment, Nature Conservation, Building and Nuclear Safety Publication	Alparc Website	978-3-00-053702-8	2016	BMUB	Germany	Rostock	Male	English	EUSALP	Report and synthesis of value of ecological connectivity		Discursive	Empirical	Multiple authors contribute in concluding to mediate fragmentations, ecosystems need effective connections among core areas of adequate dimension, ecosystem services as great evaluation of maintaining the resilience of a landscape. Regarding agriculture and forestry, mostly reforestation in abandon places, ecological connectivity provides open spaces		Code 2.2
73	Alparc (Guido Plassmann)	Alpine Parks 2030 - Final report	No abstract	Report	No data	Alparc Website	No ISBN	2023	Alparc	France	Chambery	Male	English	EUSALP	Strategic report		Discursive	Empirical	increase of protected areas in areas with a high degree of connectivity (with low presence of infrastructure or settlements). Open spaces play an important role in improving ecological connectivity, areas, free of building or infrastrcutres and they can occur within and outside protected areas; These areas play a key role in connecting natural areas, also fostering cooperation between planning an…		Code 2.2	Code 1.2	Code 4.1
74	CIPRA International	Save land, save soil	No abstract	Report	CIPRA publication	CIPRA International website	No ISBN	2022	CIPRA International	Germany	Munich	Male	English	EUSALP	Strategic report		Discursive	Empirical	Unsealed, healthy soils provide food, ensure biodiversity, offer recreational spaces and mitigate the consequences of the climate crisis. Nevertheless, the Alpine countries are sealing land on a daily basis, especially in urban areas. In addition, they are increasingly building wind, hydropower, biomass and solar plants due to the energy transition. Conflicts of use are pre-programmed. The econom…	soil is endangered by housing and transport development, renewable energy infrastructure and industrial land, also demand for real-estate in peri-urban and rural areas decreased further during COVID; Existing European strategies: Soil Deal for Europe, EU Biodiversity Strategy for 2030; EU soil strategy for 2030; Guidelines on best practice to limit, mitigate or compensate soil sealing, ; also alp…	Code 2.2	Code 1.1	Code 3.1
75	EUSALP AG 6	Declaration. Sustainable Land Use and Soil Protection - Joining Forces for Nature, People and the Economy	No abstract	Declaration	EUSALP AG 6	EUSALP AG 6 website	No ISBN	2018	EUSALP AG 6	Alps-Level	Alps-Level	institutional	English	EUSALP	Declaration on sustainable use of soil		Discursive	Theoretical	Soils as basis for our live, ecosystem services, limited resource soil, land use and soil sealing challenges, floods depend directly on soil conditions in the water catchment area and have impacts on soils in the flooded areas. Soil- related issues trasgress regional and national borders ; Different regulations directly address careful land use as well as qualitative and quantitative soil protect…		Code 2.2	Code 3.1	Code 4.1
76	Alpine Convention	Declaration of the XVI Alpine Conference on the Protection of Mountain Biodiversity and ist Promotion at International Level	No abstract	Declaration	Alpine Convention	Alpine Convention website	No ISBN	2020	Alpine Convention	Alps-Level	Alps-Level	institutional	English	Alpine Convention	Declaration on the protection of Mountain Biodiversity		Discursive	Theoretical	threats on mountain biodiversity: Land use, more extreme events, including severe droughts, and floods, alpine convention protocols of high relevance for protection of mountain biodiversity, with protocols also on spatial planning and soil conservation, also push of implementation of nature-based solutions		Code 1.1	Code 4.1
77	Ständiges Sekretariat der Alpenkonvention	Klima-Aktions-Plan 2.0	No abstract	Book	Alpine Convention	Alpine Convention website	No ISBN	2021	Alpine Convention	Alps-Level	Alps-Level	institutional	English	Alpine Convention	Climate Action plan		Discursive	Empirical	pressure of climate change is high: Main pillars of action within Alpine convention: Traffic, Energy, Tourism, Natural hazards, Water(management), spatial planning concepts, soils, safeguard soil quantity and quality, agriculture, forests, Alpine ecosystems, Biodiversity, Water faces new challenges, both flood and risks, Watermanagement and its integration in spatial planning processes are key el…		Code 1.1	Code 4.2
78	Überprüfungsausschuss der Alpenkonvention, Übersicht Planungsinstrumente für Raumplanung,	Vertiefte Prüfunf zum Thema "Flächensparende Bodennutzung"	No abstract	Report	Alpine Convention	Alpine Convention website	No ISBN	2019	Alpine Convention	Alps-Level	Alps-Level	institutional	German	Alpine Convention	Final report on evaluation for topic land use protection		Discursive	Theoretical	iclusion of spatial planning protocol and soil protocol; defintiion of central terms: Land/soil take (Flächenneuinanspruchnahme): Loss of largely agriculturally used and biologically productive soil through use for settlement, traffic and leisure purposes. 40 % of these areas are sealed and thus loose all biological functions. Soil sealing: coverage of soil with non-permeable cover: soil gets red…		Code 4.1	Code 1.1
79	Ballerin-Denti, A.; Cetara, L., Idone, M.	Leitfaden für die lokale Anpassung an den Klimawandel in den Alpen	No abstract	Book	Alpine Convention	Alpine Convention website	9788897500247	2014	University of Brescia	Italy	Brescia	Male	Multilingual	Alpine Convention	Report and guideline report		Discursive	Empirical	Guidelines for local adaption to climate change in Alps, climate change as pressure point, for water ressources: changes in precipitation and snowfall and temperature, higher risk for floods but at the same time high risk for droughts in summer, adaption requires: balance between dryland and wetlands, improvement of groundwater renewal, Waterretention, or renaturation of rivers, also buffer zones…		Code 4.1	Code 2.2	Code 4.2
80	Meltzian, D. Marzelli, S.; Lintzmeyer, F.; Chilla, T.	Cross-border spatial development in the Alpine Convention area. Assessment study	No abstract	Book	Alpine Convention	Alpine Convention website	No ISBN	2022	German Federal Ministry for Housing, Urban Development and Building)	Alps-Level	Alps-Level	Male	English	Alpine Convention	Assessment study		Discursive	Empirical	Assessment study, mention of Badura, Quo vadis soil protection in the Alps? ; cases of cross-border cooperation in spatial planning exist, networks exist with the AlpPlan Network and ARL working gorup, Germany notes that its spatial development plans and/or programs are not foreseen to contain measures according to Art. 9 (1a) of the Spatial Planning Protocol, cooperations: EUSALP, further Karlsr…		Code 4.1
81	Meltzian, D. Marzelli, S.; Lintzmeyer, F.; Chilla, T.	Land saving targets in Alpine countries and regions. Contribution to IP_SP1_3 of the Alpine Climate Target System	No abstract	Book	Alpine Convention	Alpine Convention website	No ISBN	2022	German Federal Ministry for Housing, Urban Development and Building)	Alps-Level	Alps-Level	Male	English	Alpine Convention	Contribution study on land saving targets		Discursive	Empirical	Information on land saving targets by numbers, goal vs. Reality, in reality of course higher than target, Scenario e.g. of net zero land take, only target land take Bavaria (11,6 ha/day in 2020), and Italy, 14,2 ha/day,		Code 3.2	Code 1.1
82	Ständiges Sekretariat der Alpenkonvention	Klimaneutrale und klimaresiliente Alpen 2050. Deklaration von Innsbruck Alpines Klimazielsystem 2050. 7. Alpenzustandsbericht "Naturgefahren Risiko-Governance"	No abstract	Declaration	Alpine Convention	Alpine Convention website	No ISBN	2019	Alpine Convention	Alps-Level	Alps-Level	institutional	multilingual	Alpine Convention	Declaration of alpine conference		Discursive	Theoretical	More proactive planning than reactive planning for prevention of natural hazards, priority of climate protection in planning processes, climate proof bs climate resilient alps, safeguarding of Ecosystem Services as a goal, security for drinking Water, planning can regulate availability, minimal land use and improved soil quality in the Alps.		Code 4.2
83	Permanent Secretariat of the Alpine Convention	Sustainable Development and Innovation. Report on the State of the Alps.	No abstract	Strategic report	Alpine Convention - Alpine Signals	Alpine Convention website	No ISBN	2011	Permanent Secretariat of the Alpine convention	Alps-Level	Alps-Level	institutional	English	Alpine Convention	Alpine report of the state of the alps for rural area development		Discursive	Theoretical	Online 17 % of the Alpine Convention area can be considered as appropriate for permanent settlement, the proportion of land available for economic use is less than that in the lowlands.wetlands of high importance are descript in FFH Directive, good practice: Landscape management in the spatial development strategy of Slovenia, provides guidelines for spatial restrictions of development due to pot…		Code 2.3
84	Permanent Secretariat of the Alpine Convention	Greening the economy in the alpine region. Report on the state of the Alps	No abstract	Strategic report	Alpine Convention - Alpine Signals	Alpine Convention website	9788897500414	2017	Permanent Secretariat of the Alpine convention	Alps-Level	Alps-Level	institutional	English	Alpine Convention	State of the Alps		Discursive	Theoretical	The Alpine Convention (PSAC 2010) covers water management in Article 2(2)e: ‘[t]he objective is to preserve or re-establish healthy water systems, in particular by keeping lakes and rivers free of pollution, by applying natural hydraulic engineering techniques and by using water power, which serves the interests of both the indigenous population and the environment alike.’ For the continuous impr…		Code 2.3	Code 4.1
85	Permanent Secretariat of the Alpine Convention	Naturgefahren. Risiko-Governance. Alpenzustandbericht	No abstract	Strategic report	Alpine Convention - Alpine Signals	Alpine Convention website	9788897500537	2019	Permanent Secretariat of the Alpine convention	Alps-Level	Alps-Level	institutional	Multilingual	Alpine Convention	State of the Alps report on risk		Discursive	Theoretical	spatial planning as most effectiv preventive measurement against natural hazards, for sfeguarding high risk area and prohibit settlement there. Retention measurements (physically in nature), e.g. renaturation of river beds, nature based solutions		Code 4.2	Code 2.1
86	Alpine Convention	Protokoll zur Durchführung der Alpenkonvention von 1991 im Bereich Naturschutz und Landschaftspflege. Protokoll "Naturschutz und Landschaftspflege"	No abstract	Protocol	Alpine Convention	Alpine Convention website	No ISBN	2002	Alpine Convention	Alps-Level	Alps-Level	institutional	Multilingual	Alpine Convention	Protocol		Discursive	Theoretical	protection of landscape elements and regenerative capactiy of landscape and natural resources, balance should be achieved in developments of spatial interventions for nature and landscape, structural elements of the landscape should be restored and maintained, Article 8 and Article 9, Any interventions should be minimized for nature and landscape (article 10)		Code 2.1	Code 4.2
87	Ernstberger, C.; Bornemann, V.	"Economical and prudent use of soil in the Alps"	No abstract	Report	Alpine Convention Working group of Soil protection	Alpine Convention website	No ISBN	2020	Alpine Convention Soil Protection Working Group	Alps-Level	Alps-Level	institutional	English	Alpine Convention	Strategic Report		Discursive	Empirical	We need our soil for producing food, for growing forests, for filtering, storing, transforming and purifying water, nutrients and substances, for regulating the water household, for local climate regulation and for global climate regulation by playing a crucial role in the carbon cycle. Biodiversity in soils is the basis for biodiversity above soils. Soils store history: one can find puzzle piece…		Code 2.2	Code 2.3	Code 3.1
88	Alpine Convention	Protokoll zur Durchführung der Alpenkonvention von 1991 im Bereich Bodenschutz. Protokoll "Bodenschutz"	No abstract	Protocol	Alpine Convention	Alpine Convention website	No ISBN	2002	Alpine Convention	Alps-Level	Alps-Level	institutional	Multilingual	Alpine Convention	Protocol		Discursive	Theoretical	aims to minimize quantitative and qualitative soil use, soil-friendly agricultural and forestry useage, saving land, minimizing erosion and soil sealing. Soil takes on a specific role within ecosystems, renewal and regenerations of used soils is really slow and topographic situation is even promoting slower development, measurements are needed for soil protection, challenges arise through settlem…		Code 4.1	Code 4.2
89	Alpine Convention	Protokoll zur Durchführung der Alpenkonvention von 1991 im Bereich Raumplanung und nachhaltige Entwicklung. Protokoll "Raumplanung und Nachhaltige Entwicklung"	No abstract	Protocol	Alpine Convention	Alpine Convention website	No ISBN	2002	Alpine Convention	Alps-Level	Alps-Level	institutional	Multilingual	Alpine Convention	Protocol		Discursive	Theoretical	Alps are of overall relevance in all over Europe. Land use challenges persist that threaten the ecological balance of the Alps, ecological retention area needs to be preserved, articel 1, 2, 3, 4, , 8, 9, with content for settlement area Siedlungsraum , aRticle 11: use of resources,		Code 4.1
90	Permanent Secretariat of the Alpine Convention	Water and Water management issues. Report on the State of the Alps	No abstract	Strategic report	Alpine Convention - Alpine Signals	Alpine Convention website	No ISBN	2009	Alpine Convention	Alps-Level	Alps-Level	institutional	English	Alpine Convention	State of the alps report on water		Discursive	Theoretical	risk for groundwater bodies by high nitrate concentrations, drought management in Po river basin, water costs in water supply, water-use conflicts, Flood protection, as topics, The discussions on the need for a separate protocol on water have been quite controversial, in particular at the meetings of the Permanent Committee of the Alpine Convention held in the years 2003 and 2004. In these meetin…		Code 1.1	Code 4.1	Code 3.2
91	ARL	Safeguarding open spaces in the alpine region	A group of members of the AlpPlan Alpine spatial planning network elaborated this position paper. It contains assessments and recommendations related to key spatial challenges of transnational relevance in the Alpine region. It generally refers to the entire Alpine macroregion (EUSALP perimeter). However, some issues are particularly relevant to the core Alpine area, defined by the Alpine Convent…	Position paper	Positionpaper ARL	ARL AlpPlan Website	No ISBN	2022	ARL	Germany	Hannover	Female	English	Alpine Convention	position paper	literature analysis	Discursive	Theoretical	recap also for Alpine Space project OSA: remaining open spaces (near-natural areas) must definitely be maintained,		Code 4.1	Code 4.2
92	Alpine Convention	Alpenkonvention. Rahmenkonvention	No abstract	Declaration	Alpine Convention	Alpine Convention website	No ISBN	1991	Alpine Convention	Alps-Level	Alps-Level	institutional	Multilingual	Alpine Convention	Declaration		Discursive	theoretical	protection of alps and responsibilities		Code 3.1	Code 3.2	Code 1.2
93	Umberto, Janin Rivolin	Surveying spatial policies in the Alpiune Space	While the Interreg IIIb Alpine space programme for transnational territorial cooperation, launched in 2000, is going to conclude its activities by the end of 2006, a new programme is expected to strart in the framework of the EU structural funds programming period 2007-2013. The present article illustrates the results of a survey on « spatial policies » in the Alpine area, conducted for a « Prosp…	Journal article	Journal of Alpine research/Revue de Geographie Alpine	References	https://doi.org/10.3406/rga.2006.2395	2006	Politecnico of Turin	Italy	Turin	Male	English	EUSALP	Review	literature analysis	Discursive	Theoretical	governance and policies within the Alpine Space, spatial policies, role of alpine convention protocols		Code 3.2
94	Peyrache-Gadeau, Véronique, Fleury, P.	Agriculture as an agent in building local identities: an alternative approach to urbanization of rural areas as exemplified in the Alpine corridor	At a time when the rural world is undergoing considerable peri-urbanisation, it is tempting to consider the changes affecting peri-urban areas as simply part of the process of urban expansion. Based on an analysis of the place and functions of agriculture in the planning and development projects of the alpine corridor in the French northern alps, this article proposes an alternative way of lookin…	Journal article	Journal of Alpine research/Revue de Geographie Alpine	References	https://doi.org/10.3406/rga.2005.2367	2005	Université de Savoie	France	Chambery	Female	English	Haute-Savoie, Faucigny , Belledonne, Grenoble	Role of spaces in planning documents	literature analysis	Case study	Theoretical	Agricultural "nun-urbanized" areas used in plans as a tool to contain towns, agricutlure obtains a role as a multifunctional space, active role of agriculture in development projects in peripheral areas, agriculture as crucial in fostering the creation of a regional identity, neither urban, nor rural, something else: space for local actors to see their possible future and participation possibilit…		Code 1.1	Code 1.2
95	Briquel, M. V.	Development issues for the Alps: survey of convergences and divergences in their meaning	The article identifies development issues for the Alps and examines their meaning. Conducted within the framework of the DIAMONT project of the Interreg IIIb Alpine Space program, the study is based on an investigation involving a panel of experts from different Alpine countries. The investigation identifies those problems that play an essential role in Alpine development issues, some of which ha…	Journal article	Journal of Alpine research/Revue de Geographie Alpine	References	https://doi.org/10.3406/rga.2006.2397	2006	Unité de Recherche Développement des Territoires Montagnards	France	Grenoble	Male	English	EUSALP	Strategic report	qualitative	Case study	Empirical	development of spaces		Code 2.3	Code 1.3
96	Pirnat, Janez; Hladnik, David	The Concept of Landscape Structure, Forest Continuum and Connectivity as a Support in Urban Forest Management and Landscape Planning	Close-to-nature urban forests and remnants of natural vegetation represent an important opportunity for urban residents to experience daily perception of and access to the natural environment. Despite there being a high percentage of forest cover (59%) and a favorable structure of the prevailing forested landscapes in Slovenia, urban expansion and infrastructure-driven development has severely we…	journal article	Forests	References	http://dx.doi.org/10.3390/f9100584	2018	Universiy of Ljubljana	Slovenia	Ljubljana	Female	English	Slovenia (Celje, Murska Sobota, Kamnik)	GIS assessment study of landscape types	quantitative	Case study	Empirical	securing adequate surfaces for public works and open spaces in advance of development requires concerted public action	in suburban areas and agricultural landscapes, the pressure of urbanization and infrastructure on forest space was less profound, most of pressure and fragmentation due to transportation is located in the lower elevation valleys, where agricultural areas are covered by a dense network of minor roads, land use and land cover mapping contributed to the development of numerous concepts of monitoring…	Code 1.1
97	Briner, S.; Huber, R.; Bebi, P.; Elkin, C.; Schmatz, D. R.; Grêt-Regamey, A.	Trade-Offs between Ecosystem Services in a Mountain Region	Mountain ecosystems provide a broad range of ecosystem services (ES). Trade-offs between different ES are an important aspect in the assessment of future sustainable land-use. Management of ES in mountain regions must confront the challenges of spatial and temporal heterogeneity, and interaction with structural changes in agriculture and forestry. Using a social-ecological modeling framework, we …	journal article	Ecology and Society	References	http://dx.doi.org/10.5751/ES-05576-180335	2013	ETH Zurich	Switzerland	Zurich	Male	English	Central Valais	GIS modeling of ES	quantitative	Case study	Empirical	good management of mountain ecosystems lead to trade-offs between provision of marketable and nonmarketable ES, integrative frameworks are crucial to adress climate changes and adaptation, socio-economic assessment also necessary, As a consequence, flexible forms of policy steering, policy measures adapted to local conditions, and the coordination of sectoral policies, e.g., through spatial plann…		Code 2.1	Code 2.2	Code 1.1
98	Huber, R.; Bebi, P.; Briner, S.; Bugmann, H.; Buttler, A.; Grêt-Regamey, A.; Hirschi, C.; Zimmermann, W.; Rigling, A.	Waldausdehnung in zwei Regionen des Schweizer Berggebiets: eine integrative Analyse	The “Mountland” project analyzes climatic and land-use changes in mountain regions from an integrative perspective. One key interaction between the forest and agricultural sector is agricultural land abandonment and the subsequent forest expansion in mountain regions. To understand and assess this phenomenon, socioeconomic developments as well as ecological mechanisms of forest expansion must be …	Journal Article	Schweizer Zeitschrift für Forstwesen	References	https://doi.org/10.3188/szf.2012.0502	2012	WSL	Switzerland	Birmensdorf	Male	German	Jura, Visp in Switzerland	GIS modeling of policy scenarios	quantitative	Case study	Empirical	liberalisation and status quo of land use, forest expansion vs. Land abandonment, what types of ecosystem services get lost by loosing agriculturally productive land, bench marks are needed also heterogeinity, interrelated relationships, , also funding is crucial to guarantee implementation of measures in polcies, in alpine valleys also topic of not letting spaces be covered by forest		Code 2.1
