# Supplementary material for: What do we know about open spaces and their ecosystem services in the European Alps? Results of a scoping literature review
Source: Copernicus journal article supplement (doi:10.5194/gh-80-207-2025), 2025-08-12
Supplement: Supplementary file 3 [file Supplement S2.xlsx]

## Sheet: S2
Table S2: Codes
No.	Code family	Sub-Codes	Description of issues/topics of codes	Author(s)	n
1	Land use conflicts	1.1: Land use conflicts and risk for open spaces	Challenges for landscape use and soil, their causes and results. Pressures arise from settlement, traffic infrastructures, effects from climate change, causing challenges for the availability of sustainably useable and functional land that is forever lost. The type of land use has fundamental consequences for the environment, especially on landscape aesthetics, biodiversity, soils, hydrology and …	Bätzing, Werner 1999; Bätzing, Werner 2017; Drobnik, T; Huber, R; Grêt-Regamey, A 2017; Hill M. 2013; Job, Hubert; Meyer, Constantin; Coronado, Oriana; Koblar, Simon; Laner, Peter; Omizzolo, Andrea; Plassmann, Guido; Riedler, Walter; Vesely, Philipp; Schindelegger, Arthur 2022; Mann, Stefan 2009; Monteiro, AT; Fava, F; Hiltbrunner, E; Della Marianna, G; Bocchi, S 2011; Mose I. 2003; Riva, Matteo;…	36
		1.2: Conservation of (cultural) landscape (sustainable development and nature-based solutions)	Goal for land use is the sustainable use of soil that is pressured by the land use conflicts that arise. Abandonment and loss of valuable land in high altitute areas as well as intensification of low-valley bottom areas, loss of regional identity and the protection of arable land is of utmost importance to safeguard the "sustainable" way of life in the Alps; nature based solutions	Briquel 2006; Pirnat, Janez; Hladnik, David 2005; Gottero, E; Larcher, F; Cassatella, C 2023; Alpine Convention 1991; Alparc (Guido Plassmann) 2023	5
2	Ecosystem services of open spaces	2.1: Soil protection and ecosystem services	Ecosystem services allow to measure the effects of land use on the space and are a crucial estimation factor. The value of land can be assessed. Soil serves additionally certain soil functions, the main onces being for food provision and buffering and filtration of water for water retention. the aforementions pressures on land also challenges the ecosystem services and soil functions which is why…	Alpine Convention protocol_2002; Briner, S.; Huber, R.; Bebi, P.; Elkin, C.; Schmatz, D. R.; Grêt-Regamey, A. 2013; Huber, R.; Bebi, P.; Briner, S.; Bugmann, H.; Buttler, A.; Grêt-Regamey, A.; Hirschi, C.; Zimmermann, W.; Rigling, A. 2012; Dubo, T; Palomo, I; Camacho, LL; Locatelli, B; Cugniet, A; Racinais, N; Lavorel, S 2023; Pristeri, G; di Martino, V; Ronchi, S; Salata, S; Mazza, F; Benedini, …	8
		2.2: Evaluation of open space value	The value of open spaces is nevertheless in need of being supported by a strong backboning spatial planning system. Argumentation covers the questions of the balance form open spaces and protected areas as this is an argument that enough open spaces already exist, Useful is the ecosystem service approach, or a market based estimation. So far also the lack of a general and accepted definition/use …	Bovet, Jana; Reese, Moritz; Köck, Wolfgang 2018; Cammerer, Holger; Thieken, Annegret H., Verburg, Peter H. 2013; Dubo, T; Palomo, I; Camacho, LL; Locatelli, B; Cugniet, A; Racinais, N; Lavorel, S 2023; Gonzalez-Redin, J; Luque, S; Poggio, L; Smith, R; Gimona, A 2016; Hladnik, D; Nastran, M 2023; Huber, R; Rigling, A; Bebi, P; Brand, FS; Briner, S; Buttler, A; Elkin, C; Gillet, F; Grêt-Regamey, A;…	26
		2.3: Spatial interdependencies and the requirement for open spaces	The paradigms of spaces and the functionality of space adress space either as functional living space or as economic space has to integrate the interconnection of differently functioning spaces, such as settlement vs. Non-settlment areas that serve different causes. The supply, flow and demand system of ecosystem services illustrates better the interdependencies that especially settlement areas h…	Vigl, LE; Depellegrin, D; Pereira, P; de Groot, R; Tappeiner, U 2017; Gret-Regamey A.; Walz A.; Bebi P. 2008; Gulinck, H; Marcheggiani, E; Verhoeve, A; Bomans, K; Dewaelheyns, V; Lerouge, F; Galli, A 2018; Job, Hubert; Willi, Gero; Mayer, Marius; Putz, Marco 2020; Kruse, S; Pütz, M 2014; Schirpke U.; Leitinger G.; Tasser E.; Rüdisser J.; Fontana V.; Tappeiner U. 2020; Schirpke U.; Candiago S.; Eg…	18
3	Governance of open spaces	3.1: Lack of regulation by effective governance	soil is an ending resource, limited settlement area in topographically highly influences alpine environment	Bertram, Dominik; Chilla, Tobias; Lambracht, Markus 2023; Gottero, E; Cassatella, C; Larcher, F 2021; Gottero, E; Larcher, F; Cassatella, C 2023; Hladnik, D 2005; Ramel, C; Rey, PL; Fernandes, R; Vincent, C; Cardoso, AR; Broennimann, O; Pellissier, L; Pradervand, JN; Ursenbacher, S; Schmidt, BR; Guisan, A 2020; Schindegger F. 2003; Wandl, Alexander; Rooij, Remon; Rocco, Roberto 2017; Bätzing, Wer…	22
		3.2: Management and Governance (instruments) of open spaces	spatial planning is the one tool that has the most suitable instruments to balance land use conflicts and necessities. Specific authorities to monitor spatial development and to regulate are lacking to fulfill their responsibilities. A lack of regulatory intensity also fosters further the final decision-making on the local decision-level, taking into account mostly local interests. Planning is in…	Bertrand, Nathalie; Cremer-Schulte, Dominik, Perrin, Mathieu 2015; Cavin, Joelle Salomon 2017; Hasslacher, P 2017; Job, H; Mayer, M; Kraus, F 2014; Mertens, E; Stiles, R; Karadeniz, N 2022; Domhardt, H.-J. 2005; Hasslacher, P. 2004; Rudaz, G. 2009; Meltzian, D. Marzelli, S.; Lintzmeyer, F.; Chilla, T. 2022; Umberto, Janin Rivolin 2006; Bätzing, Werner 1999; Bätzing, Werner 2017; Eichhorn S.; Dill…	23
4	Land use and open space planning	4.1: Paradigms and regimes in Planning for open spaces and understanding role of spatial planning	Paradigms of spatial planning foster different perspectives of what land has to ofer and how space needs to be developed, From the worthless land hypothesis to the sustainable development paradigm, objectives for spatial use shifted tremendously, caused by political and societal discussions. But "top-down" vs. "bottom-up" approaches and the fact that open spaces rarely are integrated into regiona…	Fabbro, S; Haselsberger, B 2009; Fabbro, S 2010; Farinós-Dasí, J; Pinazo-Dallenbach, P; Sánchez-Manjavacas, EP; Rodríguez-Bernal, DC 2024; Pehlke, D. 2024; Peterlin, M. 2010; Pristeri, G; di Martino, V; Ronchi, S; Salata, S; Mazza, F; Benedini, A; Arcidiacono, A 2023; Sancho Reinoso A. 2013; Salata, S. 2014; Stritih, Ana; Senf, Cornelius; Seidl, Rubert; Grêt-Regamey, Adrienne; Bebi, Peter 2021; T…	35
		4.2: Targets and requirements adressed at spatial planning	More proactive planning is required than a reactive planning taking into consideration new developments of space pressures, balance should be achieved in developments of spatial interventions for nature and landscape, spatial planning as the perfect integrative tool, but rather lacking regulatory capacity, especially for private land, evaluation of functions and services, system change needed due…	Eichhorn S.; Diller C.; Pehlke D. 2023; Herrera C. 2010; Marzelli, S; Lintzmeyer, F 2015; Meyer,C; Job, H. 2024; Peccol E.; Pellegrini M.; Pascolini M. 2021; Capello, R., Cerisola, S. 2019; Ständiges Sekretariat der Alpenkonvention 2019; Permanent Secretariat of the Alpine Convention 2019; Cammerer, Holger; Thieken, Annegret H., Verburg, Peter H. 2013; Vigl, LE; Depellegrin, D; Pereira, P; de Gro…	37
